1 **Altered synaptic adaptation and gain in sensory circuits of the casein kinase 1 delta**  
2 **(CK1d<sub>T44A</sub>) mouse model of migraine**

3 Pratyush Suryavanshi<sup>1</sup>, Punam Sawant Pokam<sup>1</sup>, KC Brennan<sup>1</sup>

4 <sup>1</sup>Neurology, University of Utah, Salt Lake City, United States

5

6 **Abstract**

7 Migraine is a very common and disabling neurological disorder that remains poorly understood at  
8 the cellular and circuit level. Transgenic mice harboring a mutation in casein kinase 1 delta  
9 (CK1d<sub>T44A</sub>) represent the first animal model of non-hemiplegic migraine. These mice have  
10 decreased sensory thresholds to mechanical and thermal pain after treatment with the migraine  
11 trigger nitroglycerin; and an increased susceptibility to cortical spreading depression (CSD), which  
12 models the migraine aura. In this study, we investigated cellular and synaptic mechanisms within  
13 sensory cortical circuits that might underlie the migraine relevant phenotypes of CK1d<sub>T44A</sub> mice,  
14 using *in vitro* and *in vivo* whole cell electrophysiology. Surprisingly we found that at resting state,  
15 CK1d<sub>T44A</sub> neurons exhibited hyperpolarized membrane potentials, due to increased tonic  
16 inhibition. Despite this reduction in baseline excitability, CK1d<sub>T44A</sub> neurons fired action potentials  
17 more frequently in response to current injection. And despite similar synaptic and dendritic  
18 characteristics to wild type neurons, excitatory but not inhibitory CK1d<sub>T44A</sub> synapses failed to adapt  
19 to high frequency short-stimulus trains, resulting in elevated steady state excitatory currents. The  
20 increased steady state currents were attributable to an increased replenishment rate of the readily  
21 releasable pool, providing a presynaptic mechanism for the CK1d<sub>T44A</sub> phenotype. Finally, during  
22 *in vivo* experiments, CK1d<sub>T44A</sub> animals showed increased duration and membrane potential  
23 variance at 'cortical up states', showing that the intrinsic and synaptic changes we observed have  
24 excitatory consequences at the local network level. In conclusion excitatory sensory cortical  
25 neurons and networks in CK1d<sub>T44A</sub> animals appear to exhibit decreased adaptation and increased  
26 gain that may inform the migraine phenotype.

27

## 28 Introduction

29 Migraine affects 12% of the world population<sup>1</sup>, and causes enormous disability, especially to  
30 women and to those in working and childbearing years<sup>2,3</sup>. Yet the disease remains poorly  
31 understood at the cellular and circuit level. Although migraine is typically associated with  
32 headache, multiple lines of evidence suggest it is a more widespread disorder of multisensory  
33 excitability and sensory gain of function<sup>4</sup>. Migraine attacks involve amplifications of multiple  
34 sensory inputs including light, sound, smell, touch, and interoception (photophobia, phonophobia,  
35 osmophobia, allodynia, and nausea, respectively)<sup>5,6</sup>. For one third of migraine patients the attack  
36 is preceded by an aura, mediated by a massive spreading depolarization of cortical tissue<sup>7</sup>.  
37 Finally, both migraine models and migraine patients exhibit a blunted response to repetitive  
38 sensory stimulation<sup>8,9</sup>.

39 However, the circuit mechanisms underlying this increased network excitability are  
40 essentially unknown. In this regard transgenic mouse models can be helpful<sup>10</sup>. Mutations found  
41 in familial hemiplegic migraine, a severe and rare form of the disease, show increases in neuronal  
42 excitability that are consistent with the network phenotypes<sup>11,12</sup>. Recently a new monogenic  
43 migraine mutation was identified, in two families carrying a loss of function mutation in casein  
44 kinase 1 delta (CK1d<sub>T44A</sub>)<sup>13</sup>. Though the CK1d<sub>T44A</sub> mutation is also rare, in contrast to prior  
45 mutations, CK1d<sub>T44A</sub> mutations segregated with phenotypically normal, non-hemiplegic migraine.  
46 Thus it is possible that insights gained from the model might be of broad relevance to the disease.  
47 Mice carrying a CK1d<sub>T44A</sub> mutation had increased sensitivity to nitroglycerin (NTG), which induces  
48 migraine in humans with the disease. They also had an increased susceptibility to CSD<sup>13</sup>. Both  
49 NTG and CSD results provide face validity regarding migraine relevance, and are consistent with  
50 an excitable network<sup>13</sup>. However unlike other monogenic migraine mutations, which encode  
51 proteins of obvious relevance to excitability, the CK1d<sub>T44A</sub> mutation is in a ubiquitous serine  
52 threonine kinase with broad roles across the organism<sup>14-17</sup>. Thus it is important to establish the  
53 cellular and circuit mechanisms that underlie the migraine phenotype of CK1d<sub>T44A</sub> mice.

54

## 55 Abbreviations

56 APs: action potentials, AHP: After-hyperpolarization, CSD: cortical spreading depression, CK1d:  
57 Casein kinase 1 delta, RRP: Readily releasable pool, PPR: Paired pulse ratio,  $V_m$ : resting  
58 membrane potential,  $R_m$ : membrane resistance, F/I curve: Frequency-current curve, I/O curve:  
59 input-output curve, IV curve: current-voltage curve, HCN channels: hyperpolarization activated  
60 cyclic nucleotide gated channels,  $I_h$  currents: Hyperpolarization induced currents, AMPARs:  $\alpha$ -  
61 amino-3-hydroxy-5-methyl-4-isoxazolepropionic acid receptors, NMDARs: N-methyl-D-aspartic  
62 acid receptors, GABA: gamma-aminobutyric acid E/IPSCs: Excitatory/Inhibitory post synaptic  
63 currents, TTX: tetrodotoxin, PTX: picrotoxin, L2/3 or 4 or 5<sub>a</sub>: cortical layer 2/3 or 4 or 5<sub>a</sub>, S1:  
64 primary somatosensory cortex

## 65 **Methods**

### 66 *Animal care and handling*

67 All protocols were approved by the Institutional Animal Care and Use Committee at the University  
68 of Utah. Animals were housed in temperature-controlled room on a 12-hour light-dark cycle.  
69 Experimenters were blind to the genotypes in all experiments.

### 70 *In vitro brain slice preparation*

71 CK1<sub>dT44A</sub> and wild type (WT) littermate mice (males, 2-3 months old) were deeply anesthetized  
72 with 4% isoflurane, and the brain removed for slice preparation. Coronal sections were cut in ice  
73 cold dissection buffer (in mM; 220 Sucrose, 3 KCl, 10 MgSO<sub>4</sub>, 1.25 NaH<sub>2</sub>PO<sub>4</sub>, 25 NaHCO<sub>3</sub>, 25  
74 Glucose, 1.3 CaCl<sub>2</sub>), Sections containing somatosensory cortex<sup>18</sup> were allowed to recover in a  
75 chamber normal artificial cerebrospinal fluid (ACSF: in mM; 125 NaCl, 3 KCl, 10 MgSO<sub>4</sub>, 1.25  
76 NaH<sub>2</sub>PO<sub>4</sub>, 25 NaHCO<sub>3</sub>, 25 Glucose, 1.3 CaCl<sub>2</sub>, and saturated with 95%O<sub>2</sub> / 5%CO<sub>2</sub>) at 35°C. For  
77 electrophysiology experiments, the sections were transferred to a submerged chamber constantly  
78 supplied with ACSF (flow rate: 2.5 mL/min, saturated with 95%O<sub>2</sub> / 5%CO<sub>2</sub>) also maintained at  
79 35°C.

### 80 *In vitro Electrophysiology recordings*

81 All whole-cell patch clamp recordings were obtained from regular spiking pyramidal neurons<sup>18</sup> in  
82 L2/3 somatosensory cortex. Neurons were visualized using differential interference contrast (DIC)  
83 microscopy and patched using glass microelectrodes (4-6 MΩ resistance, tip size of 3-4 μm). To  
84 record intrinsic membrane properties, patch electrodes were filled with intracellular solution  
85 containing 135 K-gluconate, 8 NaCl, 5 EGTA, 10 HEPES, 0.3 GTP, 2 ATP, 7 phosphocreatine  
86 (concentrations in mM, pH = 7.2). Baseline membrane voltage (resting membrane potential or  
87 V<sub>m</sub>) as well as membrane voltage responses to 20 pA current injections steps (from -100 to  
88 400pA) were recorded. Spontaneous excitatory and inhibitory post synaptic currents  
89 (EPSCs/IPSCs) were recorded using patch pipette containing 130 CsMeSO<sub>4</sub>, 3 CsCl, 10 HEPES,  
90 2 MgATP, 0.3 Na<sub>3</sub>GTP, 5 EGTA, 10 Phosphocreatine, 5 QX-314, 8 biocytin (Concentration in  
91 mM; pH 7.3). Excitatory and inhibitory currents were isolated by clamping neuronal membrane  
92 potential to -70mV (inhibitory reversal potential) and 10mV (excitatory reversal potential)  
93 respectively. EPSCs and IPSCs were pharmacologically blocked by DNQX (50 μM) and picrotoxin  
94 (20 μM) respectively; confirming the AMPA and GABA<sub>a</sub> receptor mediated nature of the respective  
95 currents.

### 96 *Recording AMPA/NMDA ratio*

97 For AMPA/NMDA ratio measurements, a concentric bipolar metal stimulating electrode (AM  
98 systems, tip diameter ~75μm) connected to a stimulus isolator (World Precision Instruments) was  
99 placed on L4 and L5a (~400μm distance from recording site). Post-synaptic evoked AMPA and  
100 NMDA receptor mediated currents were recorded by stimulating L4 and L5<sub>a</sub> (1ms, 1 to 10mV  
101 stimuli). Stimulation intensity providing ~50% of maximum response with no failure was selected  
102 for further experiments. Evoked AMPA currents were isolated at -70mV. Evoked NMDA mediated  
103 currents were isolated at 40mV in presence of DNQX (50 μM) and picrotoxin (20 μM).<sup>19</sup>

104 *Tonic inhibitory current recording*

105 Tonic inhibitory current was pharmacologically isolated using nonspecific GABA<sub>A</sub> receptor inhibitor  
106 20  $\mu$ M picrotoxin (PTX) for at least 10 mins. PTX application reduced both tonic as well as phasic  
107 inhibitory current, evident by narrowing of current data point (pA) distribution. In Tonic current  
108 was measured by subtracting inhibitory holding currents recorded (at 10 mV) after picrotoxin  
109 treatment from baseline holding current.

110 *Recording HCN channel mediated  $I_h$  current*

111 To record HCN mediated ( $I_h$ ) currents, neurons were patched using a cesium based internal  
112 solution (see above). Slices were perfused in ACSF containing in  $\mu$ M: 0.75 TTX, 10 NBQX (2,3-  
113 dihydroxy-6-nitro-7-sulfamoyl-benzo[f]quinoxaline-2,3-dione), 10 gabazine, 5 CPP (3-[2-  
114 carboxypiperazin-4-yl]-propyl-1-phosphonic acid), and 3mM tetraethylammonium chloride to  
115 ensure blockade of most voltage gated and leak currents. Hyperpolarizing pulses (from -40mV to  
116 -100mV, 500ms) were applied to record 'control' inward currents. HCN mediated currents were  
117 isolated using the selective antagonist ZD7288 (25 $\mu$ M) and subtracting currents recorded in the  
118 presence of ZD7288 from control currents (ZD7288 sensitive currents)<sup>20</sup>.

119 *Stimulus train evoked E/IPSCs*

120 For stimulus train experiments, bipolar stimulation electrodes were fabricated from pulled theta  
121 glass pipettes with 0.5 to 1G $\Omega$  resistance (4-7  $\mu$ m tip diameter), and filled with saline. Chlorinated  
122 silver wires inserted into each half of the theta glass were connected to the two poles of the  
123 stimulus isolator. Distinct barrels in L4 somatosensory cortex were identified using IR-DIC  
124 microscopy<sup>21</sup>. Theta glass stimulation electrodes were placed at the bottom edge of the barrels.  
125 Postsynaptic L2/3 neurons from the same cortical column were patched for voltage clamp  
126 recording. Postsynaptic responses to 100  $\mu$ s stimuli ranging from 1 to 10 mV intensity were  
127 recorded to establish input-output relationships. Range of stimulus intensity was restricted to  
128 evoke only column-specific monosynaptic EPSC and disynaptic IPSC responses. Stimulus  
129 intensity sufficient to evoke ~50% of the maximum responses was selected for the rest of the  
130 experiment. Trains of 10 or 30 stimuli were introduced at different frequencies (10/20/50 Hz) and  
131 resulting monosynaptic EPSC and disynaptic IPSC responses were measured by clamping post-  
132 synaptic cell voltage at -70mV and 10 mV respectively<sup>22</sup>.

133 *In vivo whole-cell recordings.*

134 Mice (males; 2-3 months old) were anesthetized using urethane (0.75 g/kg; i.p.) supplemented  
135 with isoflurane (~0.5 %). Body temperature was monitored and maintained at 35 - 37°C using a  
136 heating pad. Vital signs (HR: 470–540 bpm, SpO<sub>2</sub>: 92-98%, respiration: 120-140/min) were  
137 monitored (MouseStat, Kent Scientific) throughout the experiment, and maintained within a  
138 physiologically normal range. An Omega-shaped head bar was mounted on the skull, using glue  
139 and dental cement, and affixed with screws to a holding rod attached to the stage. A craniotomy  
140 2 mm in diameter was made above the hindpaw region of somatosensory cortex (1 mm caudal to  
141 the bregma and 2 mm lateral to the midline), and filled with 1.5% agarose (in ACSF) in order to  
142 keep the cortical surface moist and dampen the movement associated with breathing<sup>18</sup>. We used

143 *in vivo* whole-cell techniques to record the membrane potential from L2/3 neurons in the mouse  
144 somatosensory cortex and analyzed spontaneous up states in current-clamp mode at resting  
145 membrane potential (i.e., -65 to -70 mV). Patch electrodes with 4-6 M $\Omega$  resistance and longer  
146 taper were used (tip size of 3-4  $\mu$ m)<sup>18</sup>, filled with intracellular solution containing potassium  
147 gluconate to record membrane voltages and cesium methanesulphonate to record excitatory and  
148 inhibitory currents (see above).

#### 149 *Data analysis.*

150 All whole cell recordings were acquired at 20kHz and filtered at 2kHz (lowpass) using Axopatch  
151 700B amplifier. Analog data were digitized using Digidata 1330 digitizer and clampex 9 software  
152 (Axon Instruments). Access resistance was monitored throughout recordings (5mV pulses at  
153 50Hz). Recordings with access resistance higher than 20 M $\Omega$  or with > 20% change in the access  
154 resistance were discarded from analysis. 70% series resistance compensation was applied to  
155 recorded currents in voltage clamp setting. Offline data processing was done with clmapfit 10  
156 (Axon Instruments) and analysis was performed using GraphPad Prism 5 (GraphPad Software,  
157 San Diego, California), MATLAB 7.8.0 (Mathworks), Stata (statacorp) and Microsoft Excel  
158 (Microsoft Corp). Normality of distributions was determined using D'Agostino-Pearson K2 test.  
159 Average values for individual cells were compared across genotypes using student's t test  
160 (parametric data) or Mann Whitney U test (non-parametric data), whereas probability distributions  
161 of individual events were compared across genotype using two sample Kolmogorov–Smirnov  
162 (KS) test. For the analysis of current/voltage (IV curve), frequency/input current (F/I curve)  
163 relationships, and normalized post-synaptic currents in response to stimulus trains, comparisons  
164 across genotype for different values of input current/stimuli were made using two-way ANOVA  
165 (Kruskal Wallis test for non parametric data) with Bonferroni's post hoc test. To compare rise  
166 kinetics of IV and F/I curves, linear regression was fitted across datasets and slope were  
167 compared between genotypes. For the analysis of cumulative amplitudes of post-synaptic  
168 currents in response to stimulus trains, steady state responses were fitted with linear regression,  
169 and the initial fast rise was fitted with a single phase exponential<sup>23,24</sup>. For pharmacology  
170 experiments, comparisons between cells before and after drug treatment within a genotype were  
171 done by paired t-test; comparisons between control and drug treatment groups across genotypes  
172 were done by two-way ANOVA with Tukey's post hoc test. Data points more or less than 3 times  
173 standard deviation (parametric data) or mean standard error (non-parametric data) of the dataset  
174 were regarded as outliers.

175

176 **Results:**

177 **Hyperpolarized membrane potential in CK1d<sub>T44A</sub> L2/3 pyramidal neurons due to increased**  
178 **tonic inhibition**

179 To determine whether the migraine relevant excitable phenotype seen in CK1d<sub>T44A</sub> mice *in vivo*<sup>13</sup>  
180 could be attributed to intrinsic membrane excitability of pyramidal neurons in sensory cortex, we  
181 performed whole cell current clamp experiments from L2/3 excitatory somatosensory cortical  
182 neurons. On the contrary, we found that resting membrane potentials ( $V_m$ ) in CK1d<sub>T44A</sub> neurons  
183 were significantly hyperpolarized compared to those of WT neurons (figure 1C,  $p < 0.05$ , Mann  
184 Whitney test; WT  $n = 21$  neurons and CK1d<sub>T44A</sub>  $n = 22$  neurons). Membrane resistance ( $R_m$ ) which  
185 dictates  $V_m$  responses to subthreshold current injections, was not different between the two  
186 genotypes when calculated as slope of I/V curve (figure 1D,  $p = 0.99$ , ANCOVA) or  $R_m$  values for  
187 individual neurons (figure 1E,  $p = 0.36$ , Mann Whitney test, WT  $n = 21$ , CK1d<sub>T44A</sub>  $n = 22$ ); suggesting  
188 no difference in intrinsic membrane excitability. Therefore, instead of hyperexcitability, CK1d<sub>T44A</sub>  
189 were found to be hypoexcitable at resting state.

190 A candidate mechanism for resting state hyperpolarization is tonic inhibitory currents<sup>25</sup>. We  
191 pharmacologically isolated tonic inhibitory currents using the GABA<sub>A</sub> receptor antagonist  
192 picrotoxin (20  $\mu$ M) in CK1d<sub>T44A</sub> and WT neurons. We found that CK1d<sub>T44A</sub> neurons had significantly  
193 larger tonic inhibitory currents compared to WT (figure 1G,  $p = 0.03$ , Mann Whitney test, WT  $n = 8$ ,  
194 CK1d<sub>T44A</sub>  $n = 8$ ). To determine if increased tonic inhibitory currents in CK1d<sub>T44A</sub> neurons resulted in  
195 hyperpolarization, we recorded resting  $V_m$  before and after picrotoxin treatment. Though  $V_m$  in  
196 both WT and CK1d<sub>T44A</sub> neurons was depolarized following picrotoxin treatment, depolarization in  
197 CK1d<sub>T44A</sub> neurons was significantly larger (figure 1I, WT  $n = 11$ ,  $p < 0.05$ , paired t test; CK1d  $n = 12$ ,  
198  $p < 0.0001$ , paired t test). Moreover, pharmacologically abolishing of tonic inhibition current led to  
199 the rescue of hyperpolarized membrane potential in CK1d<sub>T44A</sub> mutant neurons (figure 1J,  $p < 0.05$ ,  
200 two-way ANOVA, WT  $n = 11$ , CK1d<sub>T44A</sub>  $n = 12$ ), suggesting that increased tonic inhibition was indeed  
201 the primary cause of hyperpolarized resting  $V_m$  in CK1d<sub>T44A</sub> pyramidal neurons.

202 **No difference in excitatory and inhibitory post-synaptic responses in CK1d<sub>T44A</sub> L2/3**  
203 **pyramidal neurons**

204 Neural networks require a precise balance of excitation and inhibition to perform normally.  
205 Imbalance between excitatory and inhibitory synaptic transmission may underlay migraine  
206 relevant excitability phenotype seen in CK1d<sub>T44A</sub> animals *in vivo*. To test this hypothesis, we  
207 recorded miniature excitatory and inhibitory post-synaptic currents (mE/IPSCs) from S1 L2/3  
208 neurons in presence of 1  $\mu$ M TTX. We found that neither amplitude ( $p = 0.32$ , Mann Whitney test;  
209 WT  $n = 7$  and CK1d<sub>T44A</sub>  $n = 9$  neurons; Figure 2C) nor frequency ( $p = 0.97$ , Mann Whitney test; WT  
210  $n = 7$  and CK1d<sub>T44A</sub>  $n = 9$  neurons; Figure 2C) of mEPSCs were significantly different between WT  
211 and CK1d<sub>T44A</sub> neurons. Similarly, when we compared mIPSC amplitude ( $p = 0.33$ , Mann Whitney  
212 test; WT  $n = 9$  and CK1d<sub>T44A</sub>  $n = 15$  neurons; Figure 2F) and frequency ( $p = 0.8$ , Mann Whitney test;  
213 WT  $n = 9$  and CK1d<sub>T44A</sub>  $n = 15$  neurons; Figure 2F) between WT and CK1d<sub>T44A</sub> neurons, we did not  
214 find a significant difference. These results suggest that AP independent post-synaptic responses  
215 to a single quantum of released neurotransmitter, are not significantly different between WT and  
216 CK1d<sub>T44A</sub> neurons.

217 NMDA receptors are a key component of excitatory synapses as well as a known substrates for  
218 CK1 family kinases<sup>26</sup>. Phosphorylation of NMDA receptors through CK1 kinases result in reduced  
219 receptor conductance. Hypofunction of kinase activity in CK1d<sub>T44A</sub> mice<sup>13</sup> could result in reduced  
220 phosphorylation, causing increases in NMDA receptor mediated currents<sup>26</sup>. We recorded  
221 synaptically evoked AMPA and NMDA mediated currents from L2/3 neurons by stimulating  
222 feedforward afferents from L4 and L5<sub>a</sub>. We found no significant difference in AMPA/NMDA ratio  
223 (amplitude or area) in CK1d<sub>T44A</sub> compared to WT neurons (figure 2G, p=0.24, Mann Whitney test).

#### 224 **Dendritic I<sub>h</sub> currents are not altered in L2/3 pyramidal neurons due to CK1d<sub>T44A</sub> mutation**

225 Somatic voltage responses resulting from post-synaptic currents are shaped and constrained by  
226 local dendritic input resistance, which is often determined by the density of hyperpolarization  
227 activated (I<sub>h</sub>) currents, mediated by cyclic nucleotide gated 'HCN' channels<sup>27</sup>. Reduced I<sub>h</sub> currents  
228 could not only lead to hyperpolarized dendritic V<sub>m</sub> in CK1d<sub>T44A</sub> neurons, but also result in increased  
229 voltage responses to unit synaptic input currents due to reduced dendritic resistance. We isolated  
230 I<sub>h</sub> currents from L2/3 neurons of both genotype, using the HCN specific antagonist ZD7288.  
231 Hyperpolarizing pulses (from -40mV to -100mV, 500ms) were applied to record 'control' currents  
232 in presence of pharmacological inhibitor cocktail (see methods). HCN mediated I<sub>h</sub> currents were  
233 blocked using HCN selective antagonist ZD7288 (25μM) and calculated by subtracting ZD7288  
234 sensitive currents from control currents. We found no difference in the ZD7288 sensitive I<sub>h</sub>  
235 currents between WT and CK1d<sub>T44A</sub> neurons (p = 0.95, two-way ANOVA, WT n=8, CK1d<sub>T44A</sub> n=8;  
236 Figure 2H). Combined with the likely low expression of HCN channels reported in L2/3<sup>20</sup>, this  
237 allowed us to rule out HCN dysfunction as a mechanism of the CK1d<sub>T44A</sub> phenotype.

#### 238 **Increased action potential frequency in CK1d<sub>T44A</sub> neurons in response to suprathreshold 239 current injections**

240 Thus far, our data suggested subthreshold hypoexcitability in neurons with no difference in  
241 synaptic and dendritic currents. These findings, although seemingly contradictory to our initial  
242 hypothesis, only elucidate neuronal activity at rest. Hence, we investigated suprathreshold activity  
243 in WT and CK1d<sub>T44A</sub> L2/3 neurons, recording action potential (AP) firing in response to current  
244 injection steps. We found no significant difference in the rheobase (figure 3F). However, the V<sub>m</sub>  
245 thresholds for AP induction were significantly lower in CK1d<sub>T44A</sub> neurons compared to WT (p<0.05,  
246 Mann Whitney test, WT n=21, CK1d<sub>T44A</sub> n=22 Figure 3E). Moreover, CK1d<sub>T44A</sub> neurons fired action  
247 potentials at a higher frequency compared to WT neurons, specifically at higher input current  
248 values. This resulted in a significantly higher slope of the AP frequency vs input current curve (F/I  
249 slope) in CK1d<sub>T44A</sub> neurons. (figure 3B, p<0.05, two-way ANOVA, Bonferroni's post hoc test, WT  
250 n=21 and CK1d<sub>T44A</sub> n=22; figure 3D, individual neuron comparisons: p<0.05, t test, WT n=21 and  
251 CK1d<sub>T44A</sub> n=22). Inter-spike interval between action potentials was also significantly lower in  
252 CK1d<sub>T44A</sub> neurons at the highest input current (400pA) compared to WT (figure 3H, p<0.05, two-  
253 way ANOVA, WT n=18 and CK1d<sub>T44A</sub> n=18). This difference was not evident at lower input  
254 currents (300pA, figure 3G, p=0.12, two-way ANOVA, WT n=16 and CK1d<sub>T44A</sub> n=16), suggesting  
255 impaired adaptation of action potential firing in CK1d<sub>T44A</sub> neurons at high intensity input currents.  
256 Comparison of AP waveform parameters (figure 3F, AP half-width, p=0.07; figure 3G, AHP  
257 duration, p=0.3; figure 3H, AHP amplitude, p=0.14, Mann Whitney test, WT n=21, CK1d<sub>T44A</sub> n=22)



258 as well as phase plots of  $V_m$  and its first derivative ( $dV_m/dt$ , Figure 3J) showed no difference in the  
259 depolarization and repolarization phase between CK1d<sub>T44A</sub> and WT neurons. Thus changes in  
260 kinetics of APs were not responsible for the reduced inter spike intervals in CK1d<sub>T44A</sub> neurons.

261 Tonic inhibitory currents can modulate suprathreshold activity<sup>25</sup>. We found that abolishing tonic  
262 inhibitory current with 20 $\mu$ m PTX reduced rheobase in both WT and CK1d<sub>T44A</sub> neurons (figure 3I,  
263  $p < 0.05$ , paired t test, WT,  $n = 11$ , CK1d<sub>T44A</sub>,  $n = 12$ ). However, rheobase comparison between PTX  
264 treated WT and CK1d<sub>T44A</sub> neurons was not significantly different (figure 3J,  $p < 0.05$ , two-way  
265 ANOVA, WT  $n = 11$ , CK1d<sub>T44A</sub>  $n = 12$ ). Moreover, the F/I curves of both WT (figure 3K,  $p < 0.05$ ,  
266 ANCOVA, WT  $n = 11$ ) and CK1d<sub>T44A</sub> (figure 3L,  $p < 0.05$ , ANCOVA, WT  $n = 12$ , Figure 3L) neurons  
267 were not significantly altered by PTX treatment. Thus, although increased tonic inhibition in  
268 CK1d<sub>T44A</sub> neurons contributed hyperpolarized  $V_m$ , it did not affect suprathreshold excitability.  
269 Taken together, our dissection of intrinsic and synaptic cellular properties suggested that in spite  
270 of hyperpolarized membrane potentials and identical subthreshold membrane and synaptic  
271 characteristics, CK1d<sub>T44A</sub> neurons show a suprathreshold gain of function at higher stimulus  
272 intensities.

### 273 **Frequency dependent adaptation deficit in excitatory synapses of CK1d<sub>T44A</sub> neurons**

274 To investigate microcircuit dynamics in CK1d<sub>T44A</sub> mutants, we simulated feedforward L4-L2/3  
275 afferents in acute slices at different frequencies (10, 20, 50Hz) and recorded evoked  
276 monosynaptic EPSCs and disynaptic IPSCs. We verified column specificity of stimulation by  
277 confirming lack of evoked response from cells outside column (figure 4B and C,  $p < 0.001$ , two-  
278 way ANOVA, cells within column and outside column,  $n = 4$ ), to avoid polysynaptic responses. I/O  
279 curve of L4-L2/3 synaptic stimulation was not significantly different between WT and CK1d<sub>T44A</sub>  
280 (Figure 4D,  $p = 0.7$ , ANCOVA, WT  $n = 11$ , CK1d<sub>T44A</sub>  $n = 10$ ). WT synapses showed expected  
281 adaptation to evoked E/IPSCs as well as paired pulse ratio (PPR), consistent with that described  
282 in the literature for adult L4-L2/3 somatosensory cortical synapses<sup>28,29</sup>. Evoked post-synaptic  
283 responses reached a steady state with 30 stimuli for EPSCs and 10 stimuli for IPSCs. Following  
284 50 Hz stimulation, the adaptation at CK1d<sub>T44A</sub> excitatory synapses was significantly impaired,  
285 resulting in higher amplitude of evoked steady state currents compared to WT (figure 4F,  $p < 0.05$ ,  
286 two-way ANOVA, Bonferroni's post hoc test, WT  $n = 11$ , CK1d<sub>T44A</sub>  $n = 8$ ). However, at 10 Hz, evoked  
287 EPSCs exhibited identical adaptation patterns between WT and CK1d<sub>T44A</sub> (figure 4H). Response  
288 to 20 Hz stimulation showed an intermediate phenotype, with a trend towards blunted adaptation,  
289 but no significant difference in steady state currents between WT and CK1d<sub>T44A</sub> (figure 4G).  
290 Interestingly, the increased amplitude of steady state currents was seen exclusively at excitatory  
291 synapses, not with evoked inhibitory currents (figure 4I to K,  $p > 0.05$ , two-way ANOVA,  
292 Bonferroni's post hoc test, WT  $n = 11$ , CK1d<sub>T44A</sub>  $n = 8$ ). Moreover, across all stimulation frequencies,  
293 evoked E/IPSCs revealed no significant difference in the PPR between WT and CK1d<sub>T44A</sub> (figures  
294 4F to K insets,  $p > 0.05$ , Mann Whitney test, WT  $n = 11$ , CK1d<sub>T44A</sub>  $n = 8$ ). These results suggest high  
295 frequency dependent adaptation failure at CK1d<sub>T44A</sub> excitatory synapses.

### 296 **Enhanced RRP replenishment underlies impaired adaptation at CK1d<sub>T44A</sub> excitatory synapses**

298 The rapid adaptation to repeated stimuli is a presynaptic phenomenon, due to relative depletion  
299 and replenishment of the readily releasable pool (RRP), a process that has biphasic kinetics<sup>23,24,30</sup>.  
300 When subjected to sustained stimulation, the RRP initially depletes quickly as the rate of release  
301 is greater than the rate of replenishment. Later, RRP replenishment maintains equilibrium with  
302 RRP release, as post-synaptic responses reach a steady state<sup>23,24</sup>. Kinetics of RRP replenishment  
303 can be resolved using cumulative amplitude plots of post-synaptic responses. We dissected  
304 biphasic kinetics of RRP replenishment with the single phase exponential fitted to the initial rise  
305 (fast RRP) and linear regression fitted through the steady state (slow RRP) with Y intercept of the  
306 linear regression is an indicator of the size of the RRP (figure 5A)<sup>24,30</sup>. The linear regression slopes  
307 of cumulative E/IPSC amplitude plots were not significantly different between WT and CK1d<sub>T44A</sub>  
308 at any stimulation frequency (figures 5B to G, top, p>0.05, ANCOVA, WT n=11, CK1d<sub>T44A</sub> n=8).  
309 Similarly, the Y intercept values of the linear regression were not different at any frequency for  
310 EPSC or IPSC plots between WT and CK1d<sub>T44A</sub> (figure 5B-G bottom right). Therefore, WT and  
311 CK1d<sub>T44A</sub> had similar slow RRP replenishment rate and RRP size. However, the single exponential  
312 rise of EPSC cumulative amplitude plots was significantly faster in CK1d<sub>T44A</sub> at both 50 Hz and 20  
313 Hz (figure 5B and C top, p<0.0001, F test with AIC correction, WT n=11, CK1d<sub>T44A</sub>n=8), along with  
314 significantly higher time constant ( $\tau$ ) values in CK1d<sub>T44A</sub> (figure 5B and C bottom left, p<0.05, Mann  
315 Whitney test, WT n=11, CK1d<sub>T44A</sub>n=8). No difference in the initial exponential rise was seen in the  
316 cumulative EPSCs at 10Hz as well as cumulative IPSCs at every stimulation frequency (figures  
317 5E to G). This suggests that the frequency dependent adaptation failure at CK1d<sub>T44A</sub> excitatory  
318 synapses is due to more efficient 'fast' replenishment of the RRP.

### 319 **Impaired adaptation at excitatory synapses leads to a net excitatory shift in excitation-** 320 **inhibition balance**

321 In a separate set of experiments to isolate fast RRP replenishment in evoked EPSCs, we  
322 stimulated the L4-L2/3 synapse with only 10 stimuli not allowing the post-synaptic responses to  
323 reach steady state. Similar to our experiments with 30 stimuli, we found that the evoked EPSCs  
324 failed to adapt at CK1d<sub>T44A</sub> synapses, specifically at 50Hz (figure 6C, p<0.05, two-way ANOVA,  
325 WT n=8, CK1d<sub>T44A</sub> n=13). However, there was no difference in the PPR between genotypes (figure  
326 6C, inset). We also found that single phase exponentials fitted to the cumulative amplitude plots  
327 were significantly different between WT and CK1d<sub>T44A</sub> at all stimulation frequencies (p<0.05, Two-  
328 way ANOVA, WT n=8, CK1d<sub>T44A</sub> n=13 Figure 6F to H), with significantly higher time constant ( $\tau$ )  
329 values in CK1d<sub>T44A</sub> (figure 6F inset p<0.05, Mann Whitney test, WT n=8, CK1d<sub>T44A</sub>n=13). These  
330 results recapitulate our previous observation of enhanced fast RRP replenishment at CK1d<sub>T44A</sub>  
331 excitatory synapses.

332 We then wanted to investigate whether high frequency stimulation perturbs excitation/inhibition  
333 (E/I) balance in CK1d<sub>T44A</sub> microcircuits. We used amplitudes of evoked E/IPSCs to 10 stimuli from  
334 the same neurons to generate E/I ratios and compared them across genotype. We found a  
335 significant excitatory shift in CK1d<sub>T44A</sub> compared to WT synapses at both 50 and 20 Hz stimulation  
336 (figure 6I, 50Hz: p<0.0001, Figure 6J, 20Hz: p<0.05, two-way ANOVA, WT n=8, CK1d<sub>T44A</sub>n=13)  
337 but not 10 HZ stimulation (figure 6K). Thus, frequency dependent impairment of adaptation at  
338 CK1d<sub>T44A</sub> excitatory synapses result in a net excitatory shift in L4-L2/3 synapses.

339 **Adaptation deficit at CK1d<sub>T44A</sub> excitatory synapses is independent of presynaptic NMDAR**  
340 **function**

341 Recent evidence suggests that RRP replenishment may be modulated by presynaptic NMDA  
342 receptors at cortical synapses<sup>31</sup>. CK1 isoforms phosphorylate NMDA receptors, especially NR2B  
343 subunits found presynaptically in adult cortex, decreasing their conductance<sup>26</sup>. We hypothesized  
344 that the reduced kinase activity in CK1d<sub>T44A</sub> mice<sup>13</sup> could lead to an increase in presynaptic NMDA  
345 currents, resulting in a gain of presynaptic function consistent with the observed phenotype. To  
346 test this hypothesis we eliminated the possible role of post-synaptic NMDARs with intracellular  
347 application of MK801 (10 $\mu$ M) via patch pipette, and isolated presynaptic NMDA currents by  
348 applying AP5 (50 $\mu$ M) to the bath (figure 7A). Intracellular MK801 that blocked post-synaptic  
349 NMDA currents did not alter excitatory synaptic adaptation in WT or CK1d<sub>T44A</sub> neurons  
350 (Supplimentary figure). More importantly, bath application of AP5 had no effect on the increased  
351 steady state currents in CK1d<sub>T44A</sub> neurons (figure 7C right,  $p>0.05$ , two-way ANOVA, CK1d<sub>T44A</sub>  
352 MK801 and CK1d<sub>T44A</sub> MK801+AP5  $n=7$ ). Therefore, pre-synaptic NMDARs do not likely contribute  
353 to the elevated excitatory steady state currents seen at CK1d<sub>T44A</sub> synapses. Moreover, kinetic  
354 analysis of cumulative amplitudes revealed that bath application of AP5 did not affect either linear  
355 regression slopes (figure 7C right,  $p>0.05$ , ANCOVA, CK1d<sub>T44A</sub> MK801 and CK1d<sub>T44A</sub> MK801+AP5  
356  $n=7$ ) or the single phase exponential rise (figure 7C right,  $p>0.05$ , F test with AIC correction,  
357 CK1d<sub>T44A</sub> MK801 and CK1d<sub>T44A</sub> MK801+AP5  $n=7$ ) that quantify components of RRP. This  
358 suggests that the adaptation deficit due to enhanced fast RRP replenishment in CK1d<sub>T44A</sub>  
359 synapses was independent of pre-synaptic NMDAR function.

360 **Inhibition of recurrent excitation abolished increase in action potential frequency in**  
361 **CK1d<sub>T44A</sub> neurons**

362 CK1d<sub>T44A</sub> neurons showed larger number of APs with increased current intensities (180-200pA  
363 suprathreshold current), compared to WT. At such high intensities, neurons typically fire APs at  
364 30-40 Hz<sup>32</sup>. Due to impairment of excitatory synaptic adaptation at higher frequencies, recurrent  
365 excitation (feedback excitation generated due to neuronal activity) on CK1d<sub>T44A</sub> neurons can be  
366 amplified<sup>33</sup>. To test whether increased recurrent excitation is responsible for increased AP firing,  
367 we recorded F/I curves in presence of glutamate receptor antagonists. Post-synaptic NMDARs  
368 were blocked using 10 $\mu$ M MK801 in the patch pipette and AMPARs with 20 $\mu$ M CNQX applied in  
369 the bath. Interestingly, abolishing recurrent excitation with post-synaptic glutamate receptor  
370 antagonists normalized input current dependent increase in AP frequency seen in CK1d<sub>T44A</sub>  
371 neurons (figure 7H left:  $p>0.05$ , two-way ANOVA, WT  $n=7$ , CK1d<sub>T44A</sub>  $n=10$ ). It also rescued  
372 differences in F/I curve slopes between genotypes (figure 7H right:  $p>0.05$ , two-way ANOVA, WT  
373  $n=7$ , CK1d<sub>T44A</sub>  $n=10$ ), implying that increased AP firing in CK1d<sub>T44A</sub> neurons at higher current  
374 intensities was due to amplified recurrent excitation.

375 **Excitable sensory cortical circuits in CK1d<sub>T44A</sub> mice *in vivo***

376 We wanted to test whether the cellular and synaptic phenotypes we observed *in vitro*, were  
377 reflected in sensory network phenotypes *in vivo*. Cortical slow oscillations (1Hz), expressed as  
378 depolarized 'up state' and hyperpolarized 'down states', represent a form of dynamic gain  
379 modulation<sup>34,35</sup>. The depolarized 'up states' increase the likelihood of neuronal AP generation

380 upon feedforward stimulus<sup>35-37</sup>. We recorded membrane responses of S1 L2/3 pyramidal neurons  
381 to network driven up and down states using *in vivo* current clamp recordings. Consistent with our  
382 *in vitro* findings, neuronal resting  $V_m$  were significantly hyperpolarized in CK1d<sub>T44A</sub> mice *in vivo*  
383 ( $p < 0.05$ , Mann Whitney test, WT N=5 and CK1d<sub>T44A</sub> N=5, figure 8B) suggesting that *in vitro* cellular  
384 phenotypes were similarly operant *in vivo*. Comparison of 'up states' revealed that their duration  
385 was significantly increased in CK1d<sub>T44A</sub> mice compared to WT (figure 8C,  $p < 0.001$ ; 2-sample KS  
386 test; WT N=5 and CK1d<sub>T44A</sub> N=5). The percent time neurons spent in 'up states' was also  
387 significantly higher in CK1d<sub>T44A</sub> mice (figure 8D,  $p < 0.05$ , Mann Whitney test, WT N=5 and  
388 CK1d<sub>T44A</sub> N=5).  $V_m$  variance during up states was also significantly greater in CK1d<sub>T44A</sub> compared  
389 to WT neurons ( $p < 0.0001$ , Mann Whitney test, WT N=5 and CK1d<sub>T44A</sub> N=5). The 'up state'  
390 phenotype in CK1d<sub>T44A</sub> mice is consistent with increase in local network excitability, as the  
391 phenotype is shared by mouse models of other neurological disorders like epilepsy<sup>36</sup>.

392 Neurons exhibit excitatory ( $V_{\text{clamp}} -70\text{mV}$ ) and inhibitory ( $V_{\text{clamp}} 20\text{mV}$ ) synaptic currents during up  
393 states, which can be quantified as E/I ratio. We found a robust increase in the half width as well  
394 as area of excitatory (figure 8F,  $p < 0.05$ , 2-sample KS test, WT N=5 and CK1d<sub>T44A</sub> N=5) compared  
395 to inhibitory (figure 8I  $p > 0.05$ , 2-sample KS test) current recorded during up states in CK1d<sub>T44A</sub>  
396 mice, resulting in a significant shift in E/I balance towards excitation in CK1d<sub>T44A</sub> mice (figure 8I,  
397  $p < 0.05$ , 2-sample KS test, WT N=5 and CK1d<sub>T44A</sub> N=5). This results, taken together with 'up  
398 states', provides a robust evidence of excitable sensory networks in CK1d<sub>T44A</sub> mice.

399

## 400 Discussion

401 Migraine is a common neurological disorder that severely impairs quality of life and imposes a  
402 serious economic burden on society<sup>1,3</sup>. Apart from the headaches and craniofacial pain, a key  
403 feature in migraine is sensory network excitability<sup>4</sup>. One third of migraine attacks are preceded by  
404 sensory hallucinations called ‘auras’, triggered by a self-propagating cortical wave of neuro-glial  
405 depolarization called cortical spreading depression (CSD)<sup>4,7</sup>. CSD is followed by long term  
406 perturbation of subcortical sensory activity, of cortical synaptic transmission<sup>18</sup> and sensory  
407 processing<sup>38</sup>, which may contribute to a global increase in pan-multi-sensory gain (photophobia,  
408 phonophobia, allodynia etc.)<sup>5,6</sup>. Similar multisensory gain phenotypes occur in migraine without  
409 aura; thus other mechanisms likely converge to activate the overall network response.  
410 Interestingly, migraineurs report reduced habituation to repeated sensory stimuli under normal  
411 conditions, which may contribute to sensory hypersensitivity<sup>8,9</sup>. However, the precise molecular  
412 and cellular mechanisms that render migraineurs susceptible to such excitability are poorly  
413 understood.

### 414 **CK1d<sub>T44A</sub> mutant mice: a new model of non-hemiplegic migraine with obscure mechanisms**

415 Although migraine is more commonly polygenic<sup>4</sup>, animal models of monogenic forms of the  
416 disorder offer a unique opportunity for mechanistic dissection. Thus far, mouse models of  
417 migraine have carried mutations identified from patients with a severe monogenic form, familial  
418 hemiplegic migraine (FHM 1 and 2)<sup>12</sup>. Both these models share common a migraine phenotype  
419 (increased susceptibility to CSD evoked in sensory cortex)<sup>11</sup>, as well as a common mechanism  
420 (gain of function at glutamatergic synapses either by increased glutamate release in FHM1<sup>39,40</sup> or  
421 impaired glutamate reuptake in FHM2<sup>41</sup>). Apart from reduced CSD threshold, excitable sensory  
422 network features are a common theme in migraineurs and migraine models alike<sup>4</sup>. Familial  
423 hemiplegic migraine models show increased output at excitatory synapses<sup>39,41</sup> and enhanced  
424 hippocampal long term potentiation<sup>42</sup>.

425 More recently, a loss of function mutation in the casein kinase-1 delta gene (CK1d<sub>T44A</sub>) was  
426 identified from two families with a combination of familial migraine with aura and advanced sleep  
427 phase syndrome<sup>13,43</sup>. Mice harboring this mutation show migraine relevant phenotypes including  
428 increased CSD susceptibility and increased sensitivity to the migraine trigger<sup>13</sup>. However, the  
429 CK1d protein is ubiquitously expressed in multiple cell types across various brain regions and  
430 developmental stages and interacts with different downstream signaling molecules<sup>14</sup>. Thus,  
431 though the molecular moiety responsible is identified, the circuit mechanisms by which this  
432 molecule acts are not immediately obvious. Understanding these mechanisms are important,  
433 as it they may offer insights into novel therapeutic targets for phenotypically normal migraine.

### 434 **Impaired adaptation at excitatory synapses contributes to hyperexcitability within sensory networks**

436 In this study, we used *in vitro* whole cell slice electrophysiology as our primary technique to dissect  
437 cellular and synaptic mechanisms. We found that CK1d<sub>T44A</sub> pyramidal neurons had  
438 hyperpolarized resting  $V_m$  due to increased tonic inhibitory current. However, we observed  
439 increased amplitude of the steady state evoked excitatory currents in CK1d<sub>T44A</sub>, due to impaired

440 adaptation at high stimulation frequencies. Similarly, CK1d<sub>T44A</sub> neurons fired APs at significantly  
441 higher frequencies with increased intensities of suprathreshold current injections. Increased  
442 frequency of AP was abolished by subjecting CK1d<sub>T44A</sub> neurons to glutamate receptor antagonists  
443 (AMPA and NMDA), suggesting the role of recurrent synaptic excitation induced by higher  
444 intensity of injected current. These results show that although CK1d<sub>T44A</sub> neurons are apparently  
445 hypoexcitable at resting state, the network becomes hyperexcitable when presented with intense  
446 stimuli. Finally, *in vivo* whole cell recordings from CK1d<sub>T44A</sub> animals revealed increased duration  
447 and V<sub>m</sub> variance at cortical 'up states'. These experiments show that the cellular and synaptic  
448 mechanisms we observed *in vitro* are likely operant in excitatory local networks *in vivo*.

449 Increased sensory gain is a key feature in migraine, with migraineurs reporting lack of habituation  
450 to repeated sensory stimuli<sup>8,9,44</sup>. Although synaptic adaptation is regarded as a prominent  
451 mechanism for sensory gain modulation and habituation<sup>45,46</sup>, it remains poorly investigated in  
452 migraine models. Excitatory synapses rapidly adapt to repeated sensory stimuli compared to slow  
453 adaptation at inhibitory synapses<sup>47</sup>. Fast adaptation at excitatory synapses moderates the  
454 intensity of feedforward sensory signaling that is necessary for perception without overactivating  
455 the circuit<sup>48,49</sup>. The results in this study are consistent with our previous findings showing blunted  
456 adaptation to repeated sensory stimuli *in vivo* following a migraine relevant perturbation (CSD) in  
457 WT mice<sup>38</sup>. Adaptation failure is thus present in two different migraine models, (a genetic model  
458 and a model of migraine aura), potentially providing a circuit mechanism for the habituation failure  
459 to repeated stimuli reported in migraineurs<sup>9</sup>.

#### 460 **Improved RRP turnover - a possible mechanism for the CK1d<sub>T44A</sub> synaptic adaptation** 461 **phenotype**

462 Our *in vitro* findings showing adaptation impairment at excitatory synapses strongly implicate  
463 presynaptic mechanisms<sup>50,51</sup>. The amplitudes of evoked currents at steady state depends on the  
464 size and replenishment rate of readily releasable pool (RRP), which is a small fraction of vesicles  
465 ready for immediate release in densely packed presynaptic boutons<sup>24</sup>. Upon stimulation, these  
466 vesicles are readily released, depleting the RRP. The probability of vesicular release within the  
467 RRP determines synaptic strength. Replenishment of the RRP determines release in response to  
468 consecutive stimuli, regulating short-term synaptic adaptation to multiple stimuli<sup>52</sup>. The RRP is  
469 never completely depleted following repeated stimulations, as it is replenished from a distinct pool  
470 of vesicles known as the reserve pool<sup>23</sup>, through a delicate balance between vesicular endo- and  
471 exocytosis<sup>53</sup>. Although disparate at first, the rates of depletion and replenishment of the RRP  
472 reach equilibrium eventually, resulting in steady state post-synaptic responses. This generates  
473 two distinct rates of RRP replenishment- RRP is depleted rapidly at first (fast) and then  
474 replenishment is at equilibrium with release (slow)<sup>23,54</sup>. We found that the fast component of RRP  
475 replenishment was more efficient in CK1d<sub>T44A</sub> neurons, with the slow component at steady state  
476 not different from WT. Interestingly, our finding of enhanced RRP replenishment in CK1d<sub>T44A</sub>  
477 model is phenotypically consistent with studies in the FHM1 model<sup>55</sup> – another circuit phenotype  
478 that is convergent across very different migraine models.

479 Presynaptic NMDA receptors have been shown to specifically mediate evoked release<sup>31</sup> and are  
480 implicated in regulating vesicle replenishment at different cortical synapses, either through

481 Ca<sup>2+</sup>/calmodulin dependent or several other downstream molecular mechanisms<sup>31,56–58</sup>. NMDA  
482 receptors are a known substrate for CK1 family of kinases, most prominently affecting NR2B  
483 subunit containing receptors<sup>26</sup>. Presynaptic NMDARs are implicated regulation of in presynaptic  
484 plasticity, functioning as coincidence detectors for high frequency activity<sup>59,60</sup>. In adult cortex,  
485 NR2B containing NMDA receptors are mostly found at presynaptic terminals<sup>61,62</sup>. Phosphorylation  
486 of NMDA receptors by CK1 kinases leads to reduced NMDA currents. We hypothesized that loss  
487 of function mutation in CK1<sub>dT44A</sub> would lead to increase in presynaptic NMDA currents resulting in  
488 gain of presynaptic function. However, pharmacological interventions used to selectively block  
489 pre-synaptic NMDA receptors<sup>63,64</sup> revealed no significant effect on the amplitude excitatory steady  
490 state currents, suggesting a presynaptic NMDA-independent mechanism.

491 The RRP is thought to consist of either all of the docked vesicles or a subset of them, with some  
492 studies suggesting that some undocked vesicles also contribute to the RRP through rapid  
493 recruitment<sup>24</sup>. The vesicles become part of the RRP through a molecular process called ‘vesicle  
494 priming’. *In vitro* fusion assays using knockout animals show that presynaptic proteins like RIM,  
495 Munc13, and Munc18 are essential for vesicle priming<sup>65</sup>. Current models suggest RIM interacts  
496 with Munc13 to activate release sites, while Munc13 and Munc18 mediate assembly of SNARE  
497 complex<sup>65,66</sup>, making them critical for vesicle docking and fusion. Although interactions between  
498 CK1<sub>dT44A</sub> and these presynaptic proteins are unknown, improved vesicle docking is a plausible  
499 mechanism. Another potential mechanism for the presynaptic gain of function involves synaptic  
500 vesicle proteins. CK1 kinases not only co-localize with synaptic vesicular markers<sup>67</sup>, but are  
501 shown to phosphorylate a specific subset of vesicle specific proteins, namely SV2.  
502 Phosphorylation of SV2<sub>A</sub> protein at Thr84 by CK1 family kinases controls the retrieval of  
503 synaptotagmin-1, a calcium sensor for the SNARE complex mediating release of synaptic  
504 vesicles<sup>68,69</sup>. CK1d was also found to specifically interact with the SNARE associated protein  
505 snapin, which was originally identified as a SNAP25 interacting protein that regulates the  
506 association of the calcium sensor synaptotagmin-1 with the SNARE complex<sup>15</sup>. More recent  
507 evidence suggests that snapin also interacts with a non-neuronal yet homologous SNAP23  
508 protein, which facilitates vesicle transport<sup>70</sup>. These data support a role of CK1d in the regulation  
509 of synaptic vesicle release/transport processes, but which specific protein/protein interaction is  
510 involved requires further investigation.

### 511 **‘Up state’ phenotype in CK1<sub>dT44A</sub> animals indicates hyperexcitable sensory networks *in*** 512 ***vivo***

513 Sensory perception is a multineuronal process and the mechanisms for altered perception span  
514 well beyond the single synapse level<sup>71</sup>. Migraine as a disorder of sensory gain is unlikely to be  
515 understood without understanding network-wide mechanisms. Cortical slow oscillations are a  
516 well-characterized form of dynamic gain modulation<sup>72</sup>. Our *in vivo* investigations of cortical slow  
517 oscillations show increased up state duration and membrane voltage variance, in spite of  
518 hyperpolarized resting membrane potentials. Slow oscillations (up and down states) occur in  
519 sleep and are typically measured under urethane anesthesia, but they also occur during quiet  
520 wakefulness<sup>72,73</sup>. Depolarized cortical up states provide a window for AP generation, by increasing  
521 the probability of membrane potential reaching AP threshold. Hence, an up state can act as a  
522 coincidence detector for feedforward signal transduction<sup>73,74</sup>. We found that sensory neurons from

523 CK1d<sub>T44A</sub> animals exhibit increased duration as well as  $V_m$  variance during 'up states', therefore  
524 increasing the probability of action potential firing upon receiving feedforward sensory signal<sup>37,75</sup>.  
525 Increased 'up state' frequency and duration are often regarded as markers for network excitability  
526 - e.g. in epilepsy<sup>35,36</sup>. Like epilepsy patients, migraine patients show alterations in both high- and  
527 low-frequency cortical and thalamocortical oscillations; the latter are likely correlates of up-  
528 states<sup>44,76</sup>. We also found that CK1d<sub>T44A</sub> neurons receive significantly longer excitatory post-  
529 synaptic currents during upstates, tipping the excitatory-inhibitory balance towards net excitation.  
530 This is consistent with our *in vitro* findings that indicate an increase in excitatory-inhibitory ratio of  
531 currents evoked at higher stimulation frequency. The convergent *in vitro* and *in vivo* findings  
532 provide insight on the mechanisms of sensory gain at the network level that may be relevant  
533 beyond the CK1d<sub>T44A</sub> mutation. Analogous to the common phenotype of CSD, there are multiple  
534 ways to arrive at the common circuit phenotype.

### 535 **Increased tonic inhibitory current in CK1d<sub>T44A</sub> neurons: compensatory mechanism or** 536 **consequence of network excitability?**

537 Our *in vitro* dissection shows that CK1d<sub>T44A</sub> neurons experience a significantly higher tonic  
538 inhibitory current, which is responsible for their hyperpolarized resting  $V_m$ . Pharmacological  
539 blockade of inhibitory currents revealed that increased tonic inhibition was responsible for  
540 hyperpolarized membrane potentials; however it did not have a significant effect on  
541 suprathreshold cellular properties in CK1d<sub>T44A</sub> neurons compared with WT. Tonic inhibitory  
542 currents are mediated by  $\delta$  subunit containing extra-synaptic GABA<sub>A</sub> receptors<sup>25</sup>. An increase in  
543 tonic inhibition can be attributed to a gain in number or function of extra-synaptic GABA<sub>A</sub>  
544 receptors. Likewise, presynaptic mechanisms can also lead to increase tonic inhibitory  
545 currents<sup>77,78</sup>. The magnitude of tonic inhibitory current is dependent on the balance between  
546 GABA release and reuptake, and thus varies with the intensity of local network activity<sup>78,79</sup>. GABA  
547 transporters, responsible for GABA reuptake, are near equilibrium under baseline conditions<sup>80</sup>,  
548 thus only moderate cell depolarization with brief bursts of action potentials should be sufficient for  
549 GABA transporter reversal<sup>81,82</sup>, resulting in non-vesicular release of GABA. Moreover,  
550 asynchronous GABA release during prolonged high frequency stimulation was shown to be a  
551 major contributor of tonic inhibition<sup>83</sup>. Hence, increased tonic GABA current may actually be a  
552 result of network hyperexcitability found in CK1d<sub>T44A</sub> animals, due to a presynaptic gain of function.

### 553 **Gain of function at glutamatergic synapses as a unifying mechanism linking multiple** 554 **monogenic migraine models**

555 CK1d<sub>T44A</sub> along with models of hemiplegic migraine (FHM1 and 2) show an increased  
556 susceptibility to CSD, consistent with increased sensory circuit excitability. The mechanism  
557 underlying this increased excitability is well established in FHM1 and 2, because the proteins  
558 involved have roles that are immediately attributable. FHM1 is a gain of function mutation of a  
559 P/Q type Ca<sup>2+</sup> channel subunit (CaV2.1) that results in larger presynaptic calcium currents<sup>12,40</sup>,  
560 and increased synaptic release at excitatory glutamatergic synapses<sup>39</sup>. FHM2 is a loss function  
561 mutation of an Na<sup>+</sup>/K<sup>+</sup> ATPase subunit that is essential to astrocytic glutamate transporter  
562 function, and results in impaired glutamate and K<sup>+</sup> reuptake at the excitatory synapse<sup>12,41</sup>. We  
563 found that the CK1d<sub>T44A</sub> mutation also exhibited a gain of function the glutamatergic synapse, in



564 the form of high frequency dependent impairment of presynaptic adaptation. Although the precise  
565 protein/protein interaction remains unexplored, these results provide a unifying synaptic  
566 mechanism for migraine relevant phenotypes across different models. Interestingly, this  
567 glutamatergic gain of function is larger in FHM 1 and 2 than in CK1<sub>d<sub>T44A</sub></sub>, potentially consistent  
568 with the differences in severity between hemiplegic and non-hemiplegic forms of migraine<sup>84</sup>. The  
569 cellular and synaptic gain of function found in CK1<sub>d<sub>T44A</sub></sub> in response to higher stimulus intensity  
570 recapitulates the intensity dependent hypersensitivity phenotype found in most migraineurs. The  
571 findings in this study not only establish CK1<sub>d<sub>T44A</sub></sub> as an effective model for non-hemiplegic forms  
572 of migraine, but also provide key mechanistic insights to understand migraine as a disorder of  
573 network excitability more broadly.

574

575

576

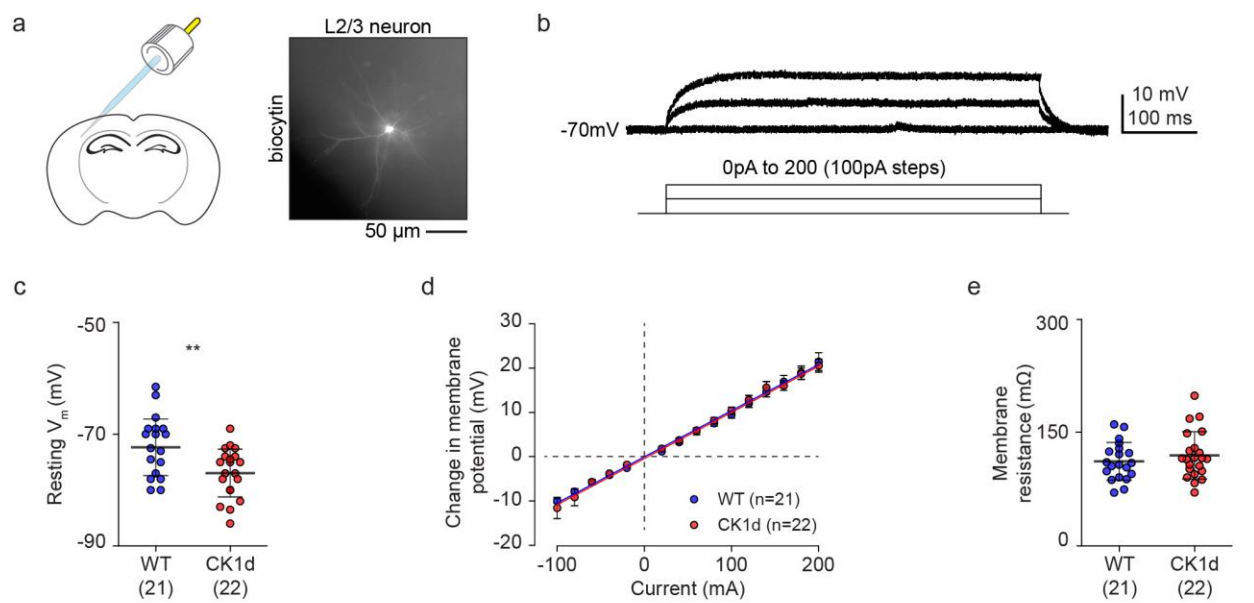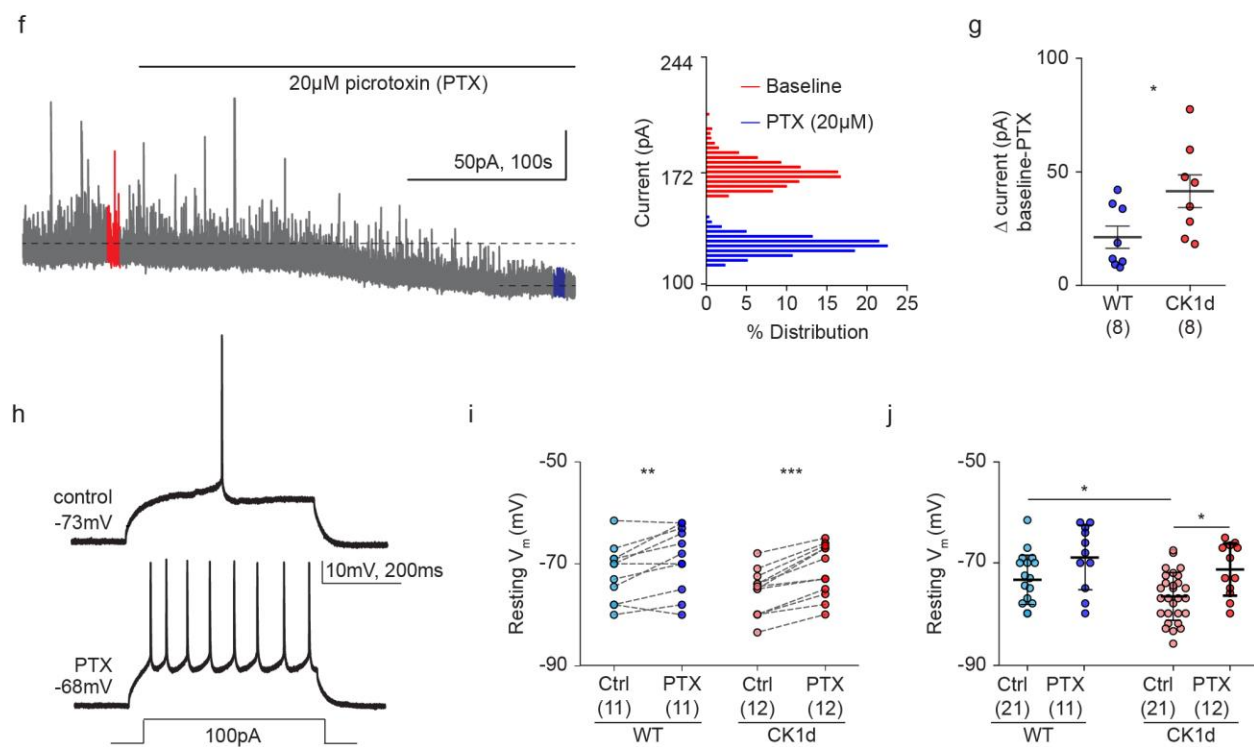

577

578 **Figure 1: Hyperpolarized membrane potentials due to increased tonic inhibition in**  
579 **CK1d<sub>T44A</sub> neurons**

580 a] Schematic showing *in vitro* whole cell patch clamp set up using acute coronal sections of mouse  
581 brain (top) and a representative image of a typical excitatory L2/3 neuron labelled with biocytin  
582 during patch clamp experiment. b] Representative traces showing membrane voltage responses  
583 to subthreshold current injections (from 0pA to 200 at 100pA steps) recorded in  $I_{\text{clamp}}$  mode. c]  
584 Comparison of resting membrane potentials ( $V_m$ ) between WT and CK1d<sub>T44A</sub> neurons revealed  
585 that CK1d<sub>T44A</sub> neurons were significantly hyperpolarized ( $p < 0.05$ , t test, WT n=21, CK1d<sub>T44A</sub> n=22).  
586 d] Comparison between slopes of the IV curves of WT and CK1d<sub>T44A</sub> neurons (Linear regression  
587 fitted through IV curves, WT slope =0.104, CK1d<sub>T44A</sub> slope =0.103,  $p = 0.99$ , analysis of covariance  
588 (ANCOVA)). e] Comparison of input resistance values for individual neurons between WT and  
589 CK1d<sub>T44A</sub> ( $p = 0.36$ , t test, WT n=21, CK1d<sub>T44A</sub> n=22). f] Left: Representative trace showing  
590 reduction in tonic inhibitory holding current recorded at  $V_{\text{clamp}}$  10mV, after application of 20 $\mu$ M  
591 picrotoxin (GABA<sub>a</sub> antagonist). Tonic inhibitory currents or picrotoxin sensitive currents are  
592 calculated by subtracting currents recorded after picrotoxin treatment from baseline (control)  
593 current. Right: % Distribution histogram shows narrow distribution with reduced mean currents  
594 after picrotoxin application (blue) compared to baseline (red). g] Tonic inhibitory currents ( $\Delta pA$ )  
595 were significantly higher in CK1d<sub>T44A</sub> neurons compared to WT ( $p < 0.05$ , Mann Whitney, WT n=8,  
596 CK1d<sub>T44A</sub> n=8). h] Representative traces showing resting membrane potential as well as voltage  
597 response to depolarizing current pulse before and after picrotoxin application. i] Difference in the  
598 resting membrane potential between individual WT neurons ( $p < 0.05$ , paired T test, n=11) as well  
599 as F] CK1d<sub>T44A</sub> neurons ( $p < 0.05$ , paired T test, n=12) before and after picrotoxin treatment. j]  
600 Pharmacological blockade of tonic inhibitory current lead to rescue of hyperpolarized membrane  
601 potentials in CK1d<sub>T44A</sub> neurons ( $p < 0.05$ , WT ctrl n=21 vs CK1d<sub>T44A</sub>ctrl n=21,  $p < 0.05$  CK1d<sub>T44A</sub>ctrl  
602 vs CK1d<sub>T44A</sub>ptx,  $p = 0.39$  WT ptx n=11 vs CK1d<sub>T44A</sub>ptx n=12, Two-way ANOVA).

603

604

605

606

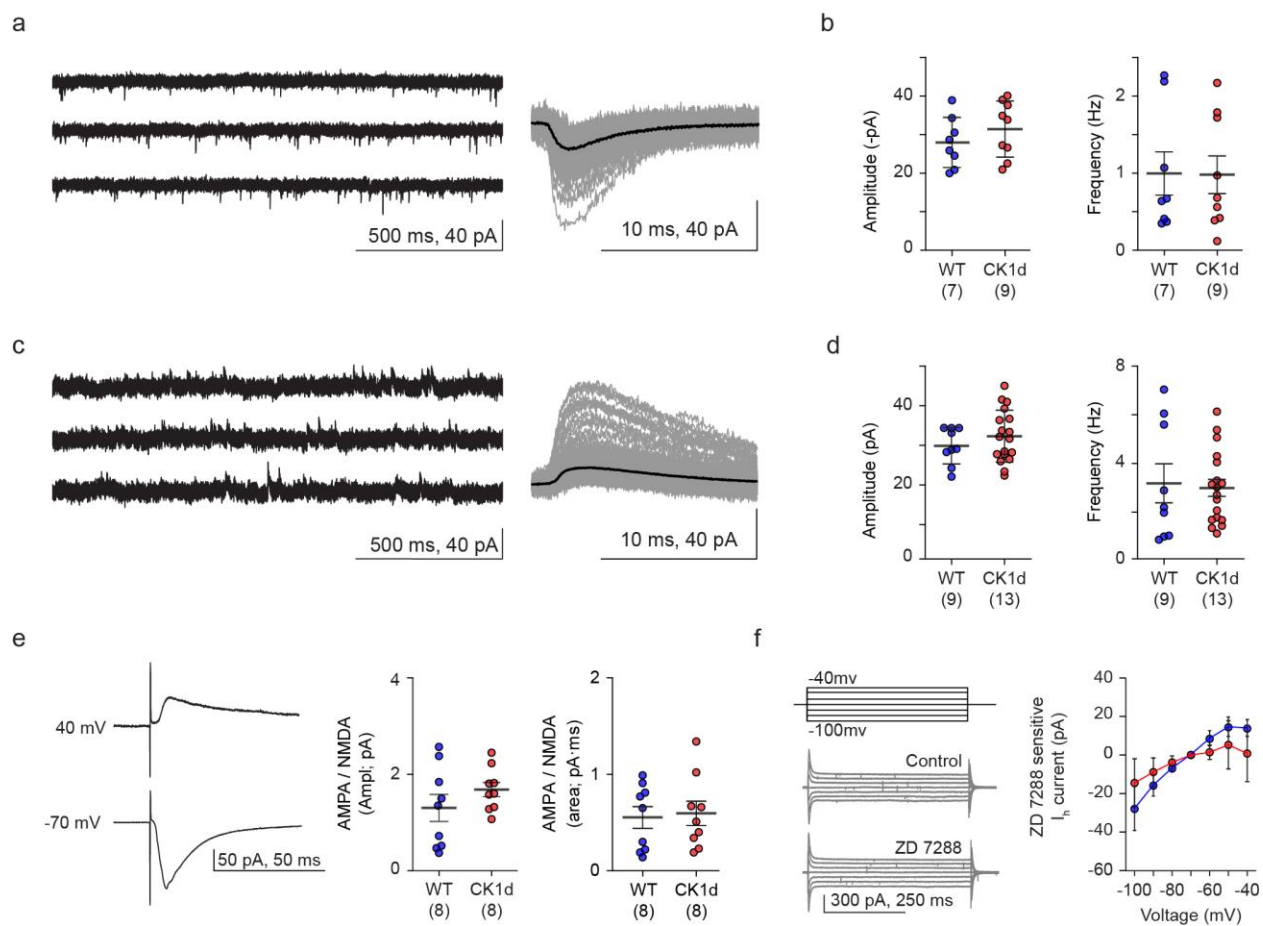

608 **Figure 2: No difference in the synaptic and dendritic currents between WT and CK1d<sub>T44A</sub>**  
609 **neurons**

610 a] Representative traces of miniature excitatory post synaptic currents (mEPSC) recorded by  
611 clamping neurons at -70mV in the presence of 1 $\mu$ M tetrodotoxin (TTX). Inset: traces of individual  
612 mEPSC events (gray) and average value for all events (black) for a single neuron. b] No significant  
613 difference was found in mEPSC amplitude (left,  $p=0.32$ , t test, WT  $n=7$ , CK1d<sub>T44A</sub>  $n=9$ ) as well as  
614 mEPSC frequency (right,  $p=0.97$ , t test, WT  $n=7$ , CK1d<sub>T44A</sub>  $n=9$ ) between WT and CK1d<sub>T44A</sub>  
615 neurons. c] Representative traces of miniature inhibitory post synaptic currents (mIPSC) recorded  
616 by clamping neurons at 10mV in the presence of 1 $\mu$ M tetrodotoxin (TTX). Inset: traces of  
617 individual mIPSC events (gray) and average value for all events (black) for a single neuron. d] No  
618 significant difference was found in mIPSC amplitude (left,  $p=0.33$ , t test, WT  $n=9$ , CK1d<sub>T44A</sub>  $n=15$ )  
619 as well as mIPSC frequency (right,  $p=0.8$ , t test, WT  $n=9$ , CK1d<sub>T44A</sub>  $n=15$ ) between WT and  
620 CK1d<sub>T44A</sub> neurons. e] Left: Representative traces of evoked AMPA currents (bottom,  $V_{\text{clamp}} -70\text{mV}$ )  
621 and evoked NMDA currents (top,  $V_{\text{clamp}} 40\text{mV}$ ) recorded from L2/3 excitatory neurons upon  
622 stimulation of L4/L5<sub>a</sub> afferents. Right: no difference was found either in AMPA/NMDA ratio of  
623 amplitude ( $p=0.24$ , t test, WT  $n=8$ , CK1d<sub>T44A</sub>  $n=8$ ) or area ( $p=0.76$ , t test, WT  $n=8$ , CK1d<sub>T44A</sub>  $n=8$ )  
624 between WT and CK1d<sub>T44A</sub> neurons. f] Left: Representative traces of currents recorded in  $V_{\text{clamp}}$   
625 mode in response to hyperpolarizing voltage steps (from -40 to -100mV). All currents were  
626 recorded in the presence of cocktail of inhibitors (1 $\mu$ M TTX, 10  $\mu$ M PTX, 10  $\mu$ M CNQX, 10  $\mu$ M  
627 XE991, 3mM TEA) to block all voltage as well as ligand gated currents. HCN channel mediated  
628  $I_h$  currents were isolated using specific antagonist ZD7288 (25 $\mu$ M). Right: comparison of  $I_h$   
629 currents or normalized ZD7288 sensitive currents between WT and CK1d<sub>T44A</sub> neurons at voltages  
630 ranging from -40 to -100 mV revealed no significant difference between the two groups ( $p>0.05$ ,  
631 two-way ANOVA, Bonferroni's post hoc test revealed non-significant differences at individual  
632 voltage steps, WT  $n=8$ , CK1d<sub>T44A</sub>  $n=8$ ).

633

634

635

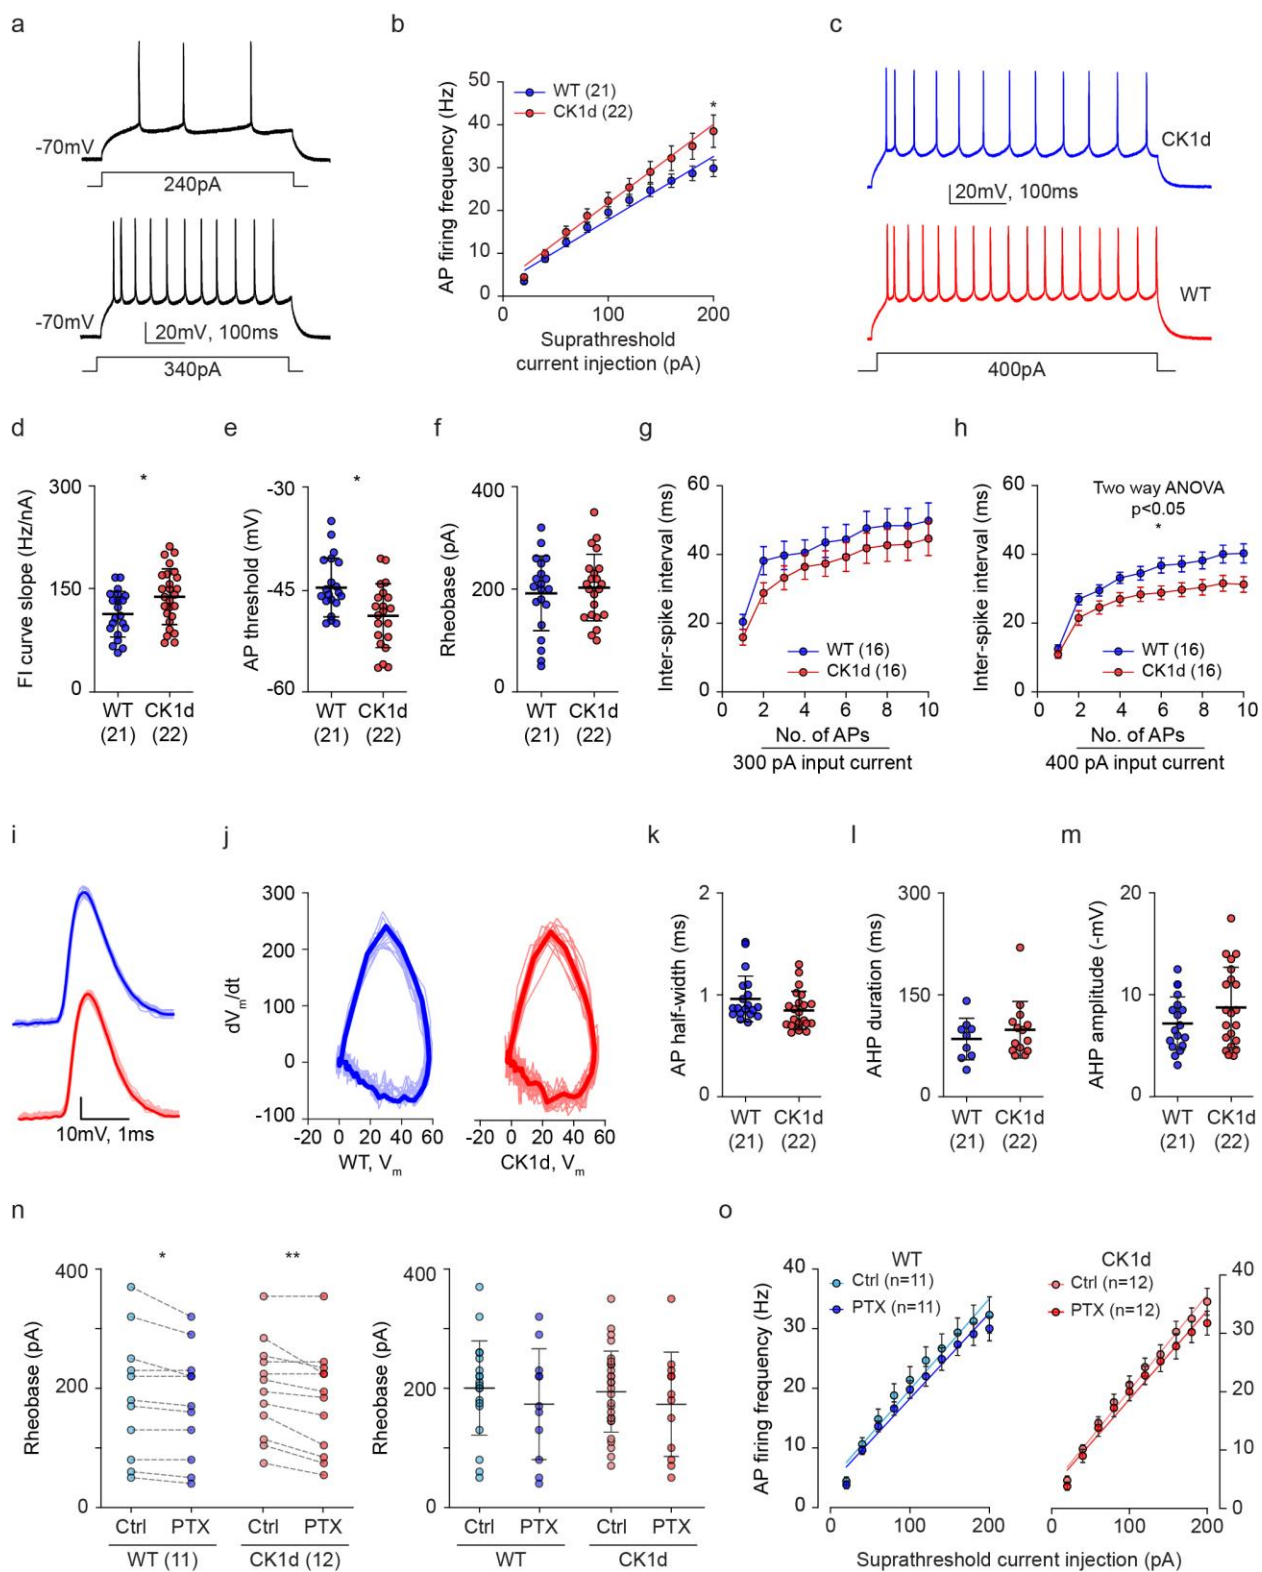

636

637 **Figure 3: Increased frequency of action potentials in CK1d<sub>T44A</sub> neurons at higher**  
638 **suprathreshold input currents**

639 a] Representative traces of L2/3 excitatory neurons firing action potentials to suprathreshold  
640 current injections. b] Comparison of action potential firing frequencies at different input current  
641 values (F/I curves) between WT and CK1d<sub>T44A</sub> neurons. F/I curves were significantly different  
642 between WT and CK1d<sub>T44A</sub> mice, especially at higher input currents. ( $p < 0.0001$ , two-way ANOVA,  
643 at 200pA,  $p < 0.05$ , Bonferroni's post hoc test). Slopes of F/I curves were also found to be  
644 significantly different between WT and CK1d<sub>T44A</sub> neurons (Linear regression fitted through F/I  
645 curves, WT slope = 0.148, CK1d<sub>T44A</sub> slope = 0.184,  $p = 0.012$ , analysis of covariance (ANCOVA)).  
646 c] Representative traces of WT (top, blue) and CK1d<sub>T44A</sub> (bottom, red) neurons firing action  
647 potentials in response to 400pA current injection. d] Comparison of F/I curve slopes calculated  
648 for individual neurons between WT and CK1d<sub>T44A</sub> neurons revealed that CK1d<sub>T44A</sub> had significantly  
649 higher F/I slopes ( $p < 0.05$ , Mann Whitney test, WT  $n = 21$ , CK1d<sub>T44A</sub>  $n = 22$ ). e] The membrane  
650 voltage thresholds values at which individual neurons started firing action potentials were  
651 significantly lower in CK1d<sub>T44A</sub> neurons ( $p < 0.05$ , non-parametric T test, WT  $n = 21$ , CK1d<sub>T44A</sub>  $n = 22$ ).  
652 f] No significant difference in rheobase between WT and CK1d<sub>T44A</sub> neurons ( $p = 0.59$ , t test, WT  
653  $n = 21$ , CK1d<sub>T44A</sub>  $n = 22$ ). g] Comparison of inter spike interval (ISI) between WT and CK1d<sub>T44A</sub>  
654 neurons was not significantly difference at 300pA ( $p < 0.0001$ , two-way ANOVA, WT  $n = 16$ ,  
655 CK1d<sub>T44A</sub>  $n = 18$ ). h] However the difference in ISI was statistically significant at 400pA ( $p < 0.0001$ ,  
656 two-way ANOVA, WT  $n = 16$ , CK1d<sub>T44A</sub>  $n = 18$ ). i] Representative AP traces (blue: WT, red:  
657 CK1d<sub>T44A</sub>, dark traces indicate averages) as well as j] phase plots  $V_m$  differentials ( $dV_m/dt$  vs  $V_m$ )  
658 showing no difference in the AP waveforms between WT and CK1d<sub>T44A</sub> neurons. No difference  
659 was observed in k] AP half-width ( $p = 0.45$ , t test, WT  $n = 21$ , CK1d<sub>T44A</sub>  $n = 22$ ), l] After-  
660 hyperpolarization or AHP duration ( $p = 0.97$ , t test, WT  $n = 21$ , CK1d<sub>T44A</sub>  $n = 22$ ) as well as m] AHP  
661 amplitude ( $p = 0.82$ , t test, WT  $n = 21$ , CK1d<sub>T44A</sub>  $n = 22$ ). n] Although picrotoxin reduced rheobase in  
662 neurons across the two genotypes (left:  $p < 0.05$ , paired t test, WT  $n = 11$ , CK1d<sub>T44A</sub>  $n = 12$ ),  
663 comparison between picrotoxin treated CK1d<sub>T44A</sub> and WT neurons showed no difference (right:  
664  $p > 0.05$ , two-way ANOVA). o] Picrotoxin did not FI slopes in both WT ( $p < 0.05$ , ANCOVA,  $n = 11$ )  
665 as well as CK1d<sub>T44A</sub> ( $p < 0.05$ , ANCOVA,  $n = 12$ ).

666

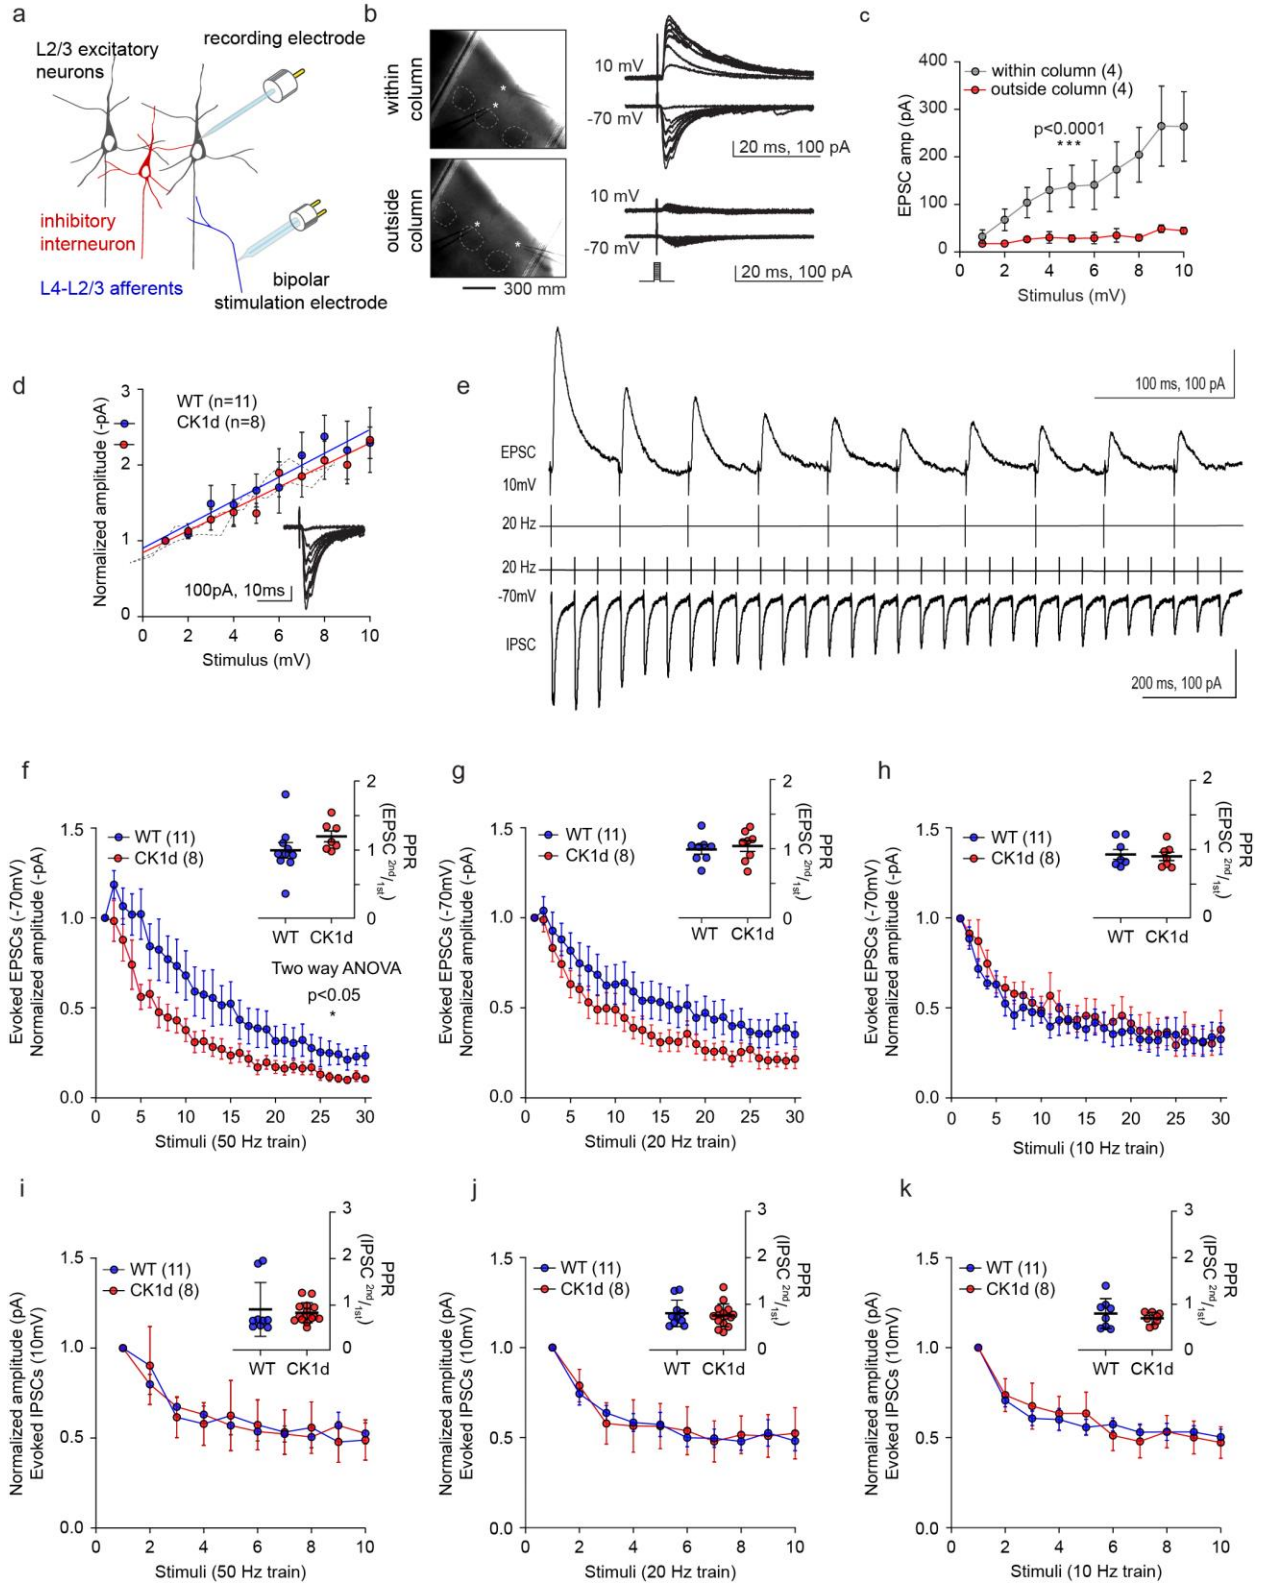



668

669 **Figure 4: Frequency dependent adaptation deficits due to higher steady state current at**  
670 **CK1d<sub>T44A</sub> excitatory synapse**

671 a] Schematic representation of L2/3 cortical microcircuit showing placement of stimulation as well  
672 as recording electrodes. b] Images and representative traces and showing experimentally evoked  
673 EPSC and IPSC responses recorded from neurons within (top) and outside (bottom) of cortical  
674 column c] Quantification of EPSC amplitudes to increasing stimulus intensities for within column  
675 and outside column stimulation ( $p < 0.0001$ , two-way ANOVA, within column  $n=4$ , outside column  
676  $n=4$ ). d] Input-output relationship between WT and CK1d<sub>T44A</sub> to selected microsimulation  
677 intensities was not significantly different ( $p=0.7$ , ANCOVA, WT  $n=11$ , CK1d<sub>T44A</sub>  $n=8$ ). e]  
678 Representative traces showing evoked EPSC and IPSC responses to trains of 30 and 10 stimuli  
679 respectively, at 20Hz. f] Normalized EPSC Steady state evoked EPSC response to 50Hz stimulus  
680 train were significantly higher at CK1d<sub>T44A</sub> synapse ( $P < 0.05$ , Two-way ANOVA; Bonferroni's post  
681 hoc test, WT  $n=11$ , CK1d<sub>T44A</sub>  $n=8$ ). Inset: no difference in the paired pulse ratio (PPR) at 50Hz  
682 between genotypes ( $p > 0.05$ , Mann Whitney test, WT  $n=11$ , CK1d<sub>T44A</sub>  $n=8$ ). No significant  
683 difference between in steady state currents ( $p > 0.05$ , Two-way ANOVA; Bonferroni's post hoc test,  
684 WT  $n=11$ , CK1d<sub>T44A</sub>  $n=8$ ) as well as PPR ( $p > 0.05$ , Mann Whitney test, WT  $n=11$ , CK1d<sub>T44A</sub>  $n=8$ ) at  
685 20Hz [g] and 10Hz [h] stimulus trains. Similarly, normalized IPSC plots showing no difference in  
686 steady state currents ( $p > 0.05$ , Two-way ANOVA; Bonferroni's post hoc test, WT  $n=11$ ,  
687 CK1d<sub>T44A</sub>  $n=8$ ) as well as PPR (inset,  $p > 0.05$ , Mann Whitney test, WT  $n=11$ , CK1d<sub>T44A</sub>  $n=8$ ) with [i]  
688 50Hz, [j] 20Hz and [k] 10Hz

689

690

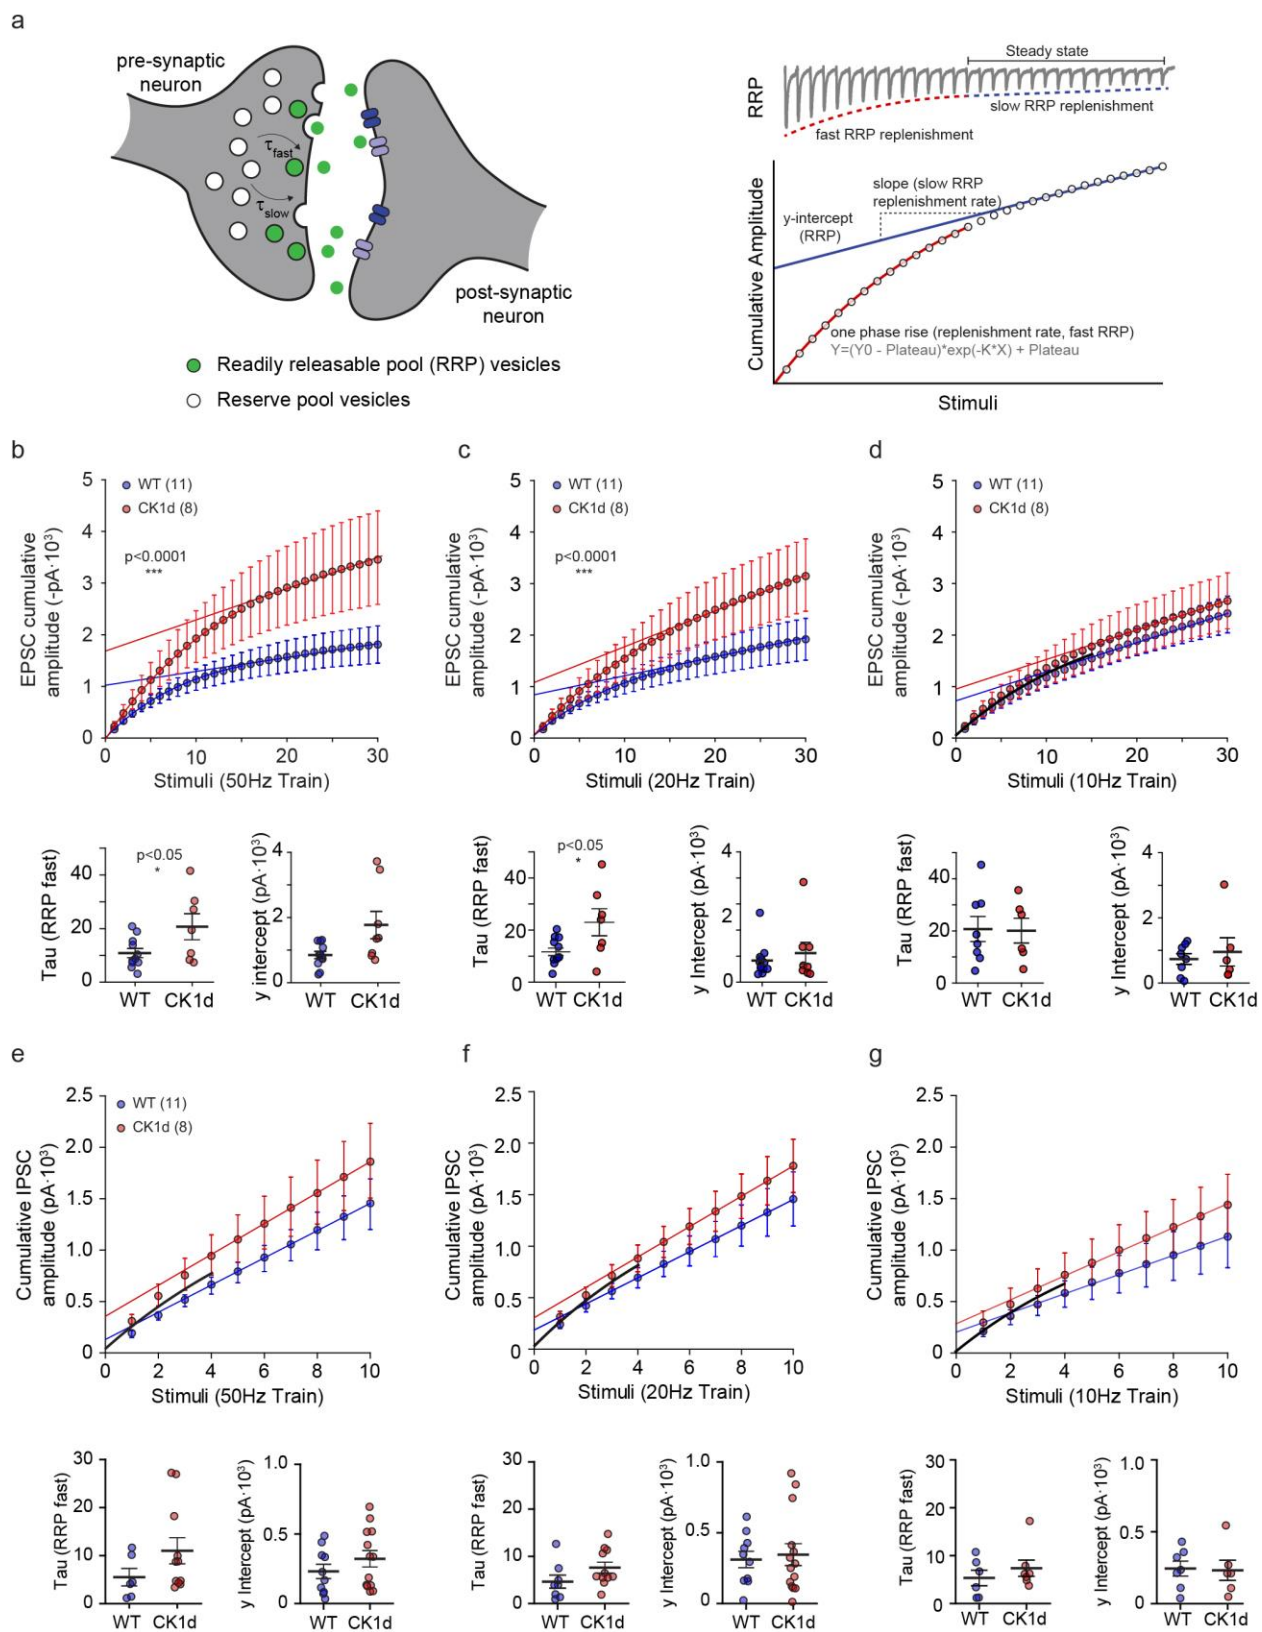

692 **Figure 5: Frequency dependent enhancement of fast replenishment of RRP at CK1d<sub>T44A</sub>**  
693 **excitatory synapses**

694 a] Left: Schematic of a model for RRP replenishment with two distinct components of their  
695 kinetics; fast and slow RRP replenishment. Right: Strategy used to analyze replenishment rates  
696 of slow and fast components of RRP using cumulative amplitude of post-synaptic response. b]  
697 Cumulative EPSC amplitude plot for 50 Hz stim train reveals no difference in the steady state  
698 linear regression slope (top,  $p > 0.05$ , ANCOVA, WT  $n=11$ , CK1d<sub>T44A</sub>  $n=8$ ), however initial one  
699 phase exponential rise was significantly faster in CK1d<sub>T44A</sub> neurons (top,  $p < 0.0001$ , F test with  
700 AIC method, WT  $n=11$ , CK1d<sub>T44A</sub>  $n=8$ ). Insets show no difference in y-intercept values (bottom  
701 right,  $p=0.08$ , Mann Whitney test, WT  $n=11$ , CK1d<sub>T44A</sub>  $n=8$ ) but a significant increase in Tau of  
702 fast one phase rise (bottom left,  $p < 0.05$ , Mann Whitney test, WT  $n=11$ , CK1d<sub>T44A</sub>  $n=8$ ) recorded  
703 from individual neurons. c] Similarly, significant increase in initial one phase exponential rise in  
704 CK1d<sub>T44A</sub> neurons (top,  $p < 0.0001$ , F test with AIC method, WT  $n=11$ , CK1d<sub>T44A</sub>  $n=8$ ) as well as  
705 significant increase in Tau of fast one phase rise (bottom left,  $p < 0.05$ , Mann Whitney test, WT  
706  $n=11$ , CK1d<sub>T44A</sub>  $n=8$ ) for EPSCs at 20Hz stimulation. None of the analyzed parameters were  
707 found to be significantly different in cumulative EPSC amplitude plot at [d] 10Hz stimulation (top,  
708  $p > 0.05$ , ANCOVA,  $p > 0.05$ , F test with AIC method, WT  $n=11$ , CK1d<sub>T44A</sub>  $n=8$ ) as well as  
709 cumulative IPSC amplitude plots recorded at either [e] 50Hz, [f] 20Hz or [g] 10Hz (top,  $p > 0.05$ ,  
710 ANCOVA,  $p > 0.05$ , F test with AIC method, WT  $n=11$ , CK1d<sub>T44A</sub>  $n=8$ ).

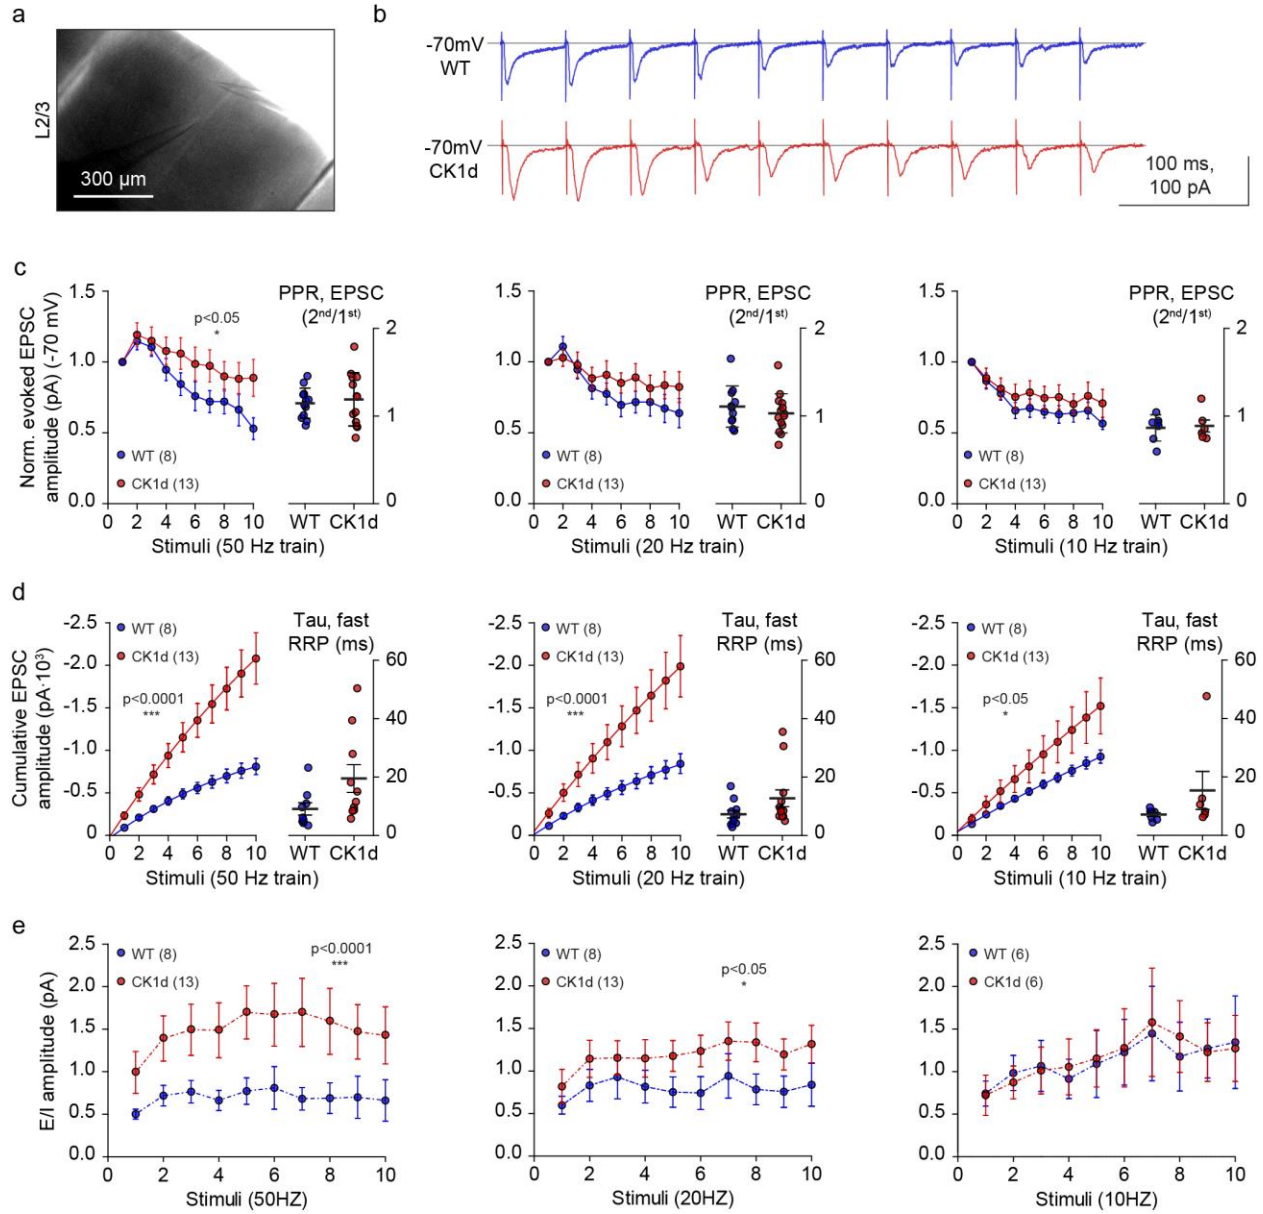

712 **Figure 6: Enhanced replenishment of fast component of RRP leads to a net excitatory shift**  
713 **in excitation-inhibition (E/I) balance in CK1d<sub>T44A</sub>**

714 a] Image showing placement of recording and stimulation electrode. b] Representative trace  
715 showing evoked EPSCs recorded from WT (top, blue) and CK1d<sub>T44A</sub> (bottom, red) in response to  
716 a train of 10 stimuli, at 20Hz. c] Increased steady state EPSC amplitude at 50Hz train of 10 stimuli  
717 ( $P < 0.05$ , Two-way ANOVA, WT  $n=8$ , CK1d<sub>T44A</sub> $n=13$ ) without increase in PPR ( $p=0.6$ , Mann  
718 Whitney test, WT  $n=8$ , CK1d<sub>T44A</sub> $n=13$ ) at CK1d<sub>T44A</sub>synapses. No difference in steady state EPSC  
719 amplitude ( $P > 0.05$ , Two-way ANOVA, WT  $n=8$ , CK1d<sub>T44A</sub> $n=13$ ) as well as PPR ( $p > 0.05$ , Mann  
720 Whitney test, WT  $n=8$ , CK1d<sub>T44A</sub> $n=13$ ) at [d] 20 Hz and [e] 10 Hz stimulus trains between WT and  
721 CK1d<sub>T44A</sub>synapses. Cumulative EPSC amplitude plots show significantly faster kinetics of  
722 exponential rise at [f] 50Hz and [g] 20Hz ( $p < 0.0001$ , F-test with AIC method, WT  $n=8$ ,  
723 CK1d<sub>T44A</sub> $n=13$ ); as well as in response to [h] 10Hz stimuli ( $p < 0.05$ , F-test with AIC method, WT  
724  $n=8$ , CK1d<sub>T44A</sub> $n=13$ ). EPSC/IPSC (E/I) ratios recorded from individual neurons reveal a significant  
725 shift towards excitation [i] at 50Hz ( $p < 0.0001$ , two-way ANOVA, WT  $n=8$ , CK1d<sub>T44A</sub>  $n=13$ ) and [j]  
726 20Hz ( $p < 0.05$ , two-way ANOVA, WT  $n=8$ , CK1d<sub>T44A</sub>  $n=13$ ); in response to trains of 10 stimuli. k]  
727 Such a difference in the E/I ratio was not seen at 10Hz ( $p > 0.05$ , two-way ANOVA, WT  $n=6$ ,  
728 CK1d<sub>T44A</sub> $n=6$ ).

729

730

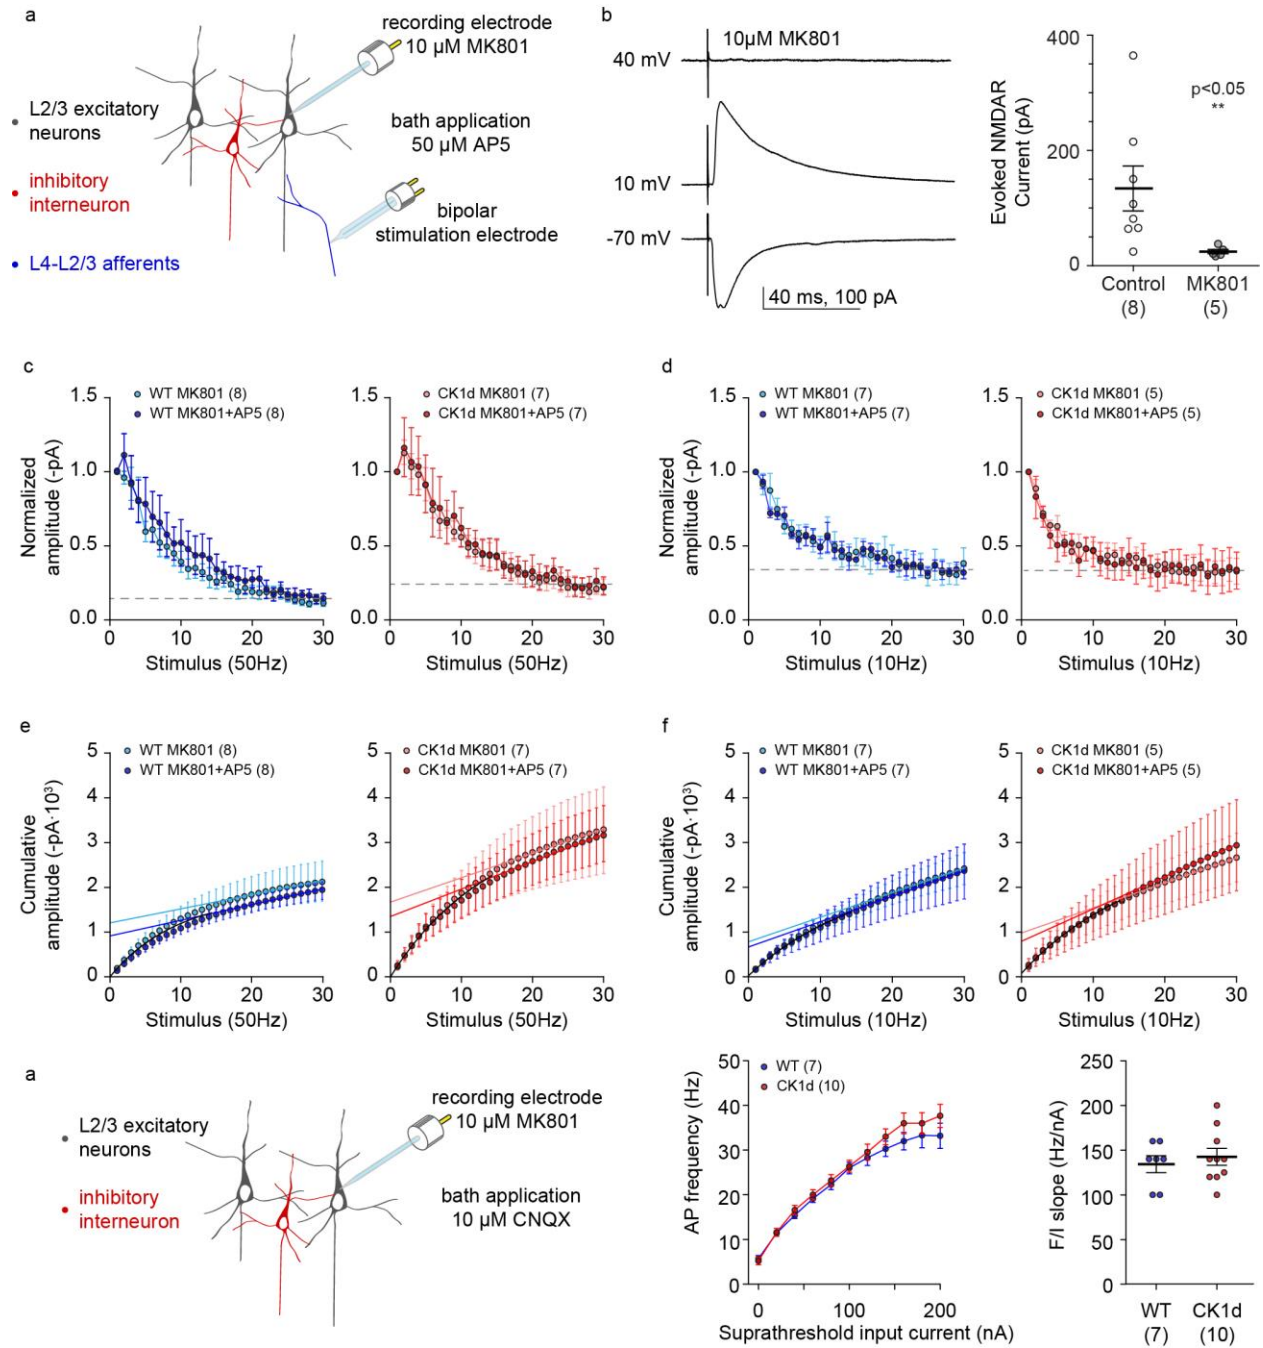

732 **Figure 7: Presynaptic NMDARs do not mediate frequency dependent excitatory steady**  
733 **state currents in CK1d<sub>T44A</sub> synapses**

734 a] Schematic showing strategy for selective blockade of post synaptic (10 $\mu$ M MK801 in patch  
735 pipette) as well as presynaptic NMDARs (50 $\mu$ M AP5 bath application). b] Representative traces  
736 showing along with quantification of NMDAR currents ( $V_{Clamp}$ : 40mV) showing selective blockade  
737 of post-synaptic NMDARs with 10 $\mu$ M MK801, yet unaffected AMPAR as well as GABAR mediated  
738 E/IPSCs. c] Presynaptic NMDAR blockade with 50 $\mu$ M AP5 had no effect on increased excitatory  
739 steady state currents in response to 50Hz stimulation (Left:  $p>0.05$ , two-way ANOVA, WT MK801  
740 vs WT MK801+AP5  $n=8$ , Right:  $p>0.05$ , two-way ANOVA, CK1d<sub>T44A</sub>MK801 vs  
741 CK1d<sub>T44A</sub>MK801+AP5  $n=7$ ) as well as d] 10Hz stimulation. e] Initial exponential rise as well as  
742 steady state linear regression slopes of cumulative EPSC amplitude plot were not significantly  
743 different between WT and CK1d<sub>T44A</sub>at 50Hz ( $p<0.05$ , F test with AIC corrections;  $p>0.05$ ,  
744 ANCOVA, WT MK801 vs WT MK801+AP5  $n=7$ , CK1d<sub>T44A</sub> MK801 vs CK1d<sub>T44A</sub> MK801+AP5  $n=5$ )  
745 as well as f] 10Hz stimulation. g] Schematic showing pharmacological inhibition of post-synaptic  
746 NMDARs (10 $\mu$ M MK801 in patch pipette) and AMPARs (20 $\mu$ M CNQX bath application). h] F/I  
747 curve (left) demonstrating that inhibition of post-synaptic glutamate receptors normalized input  
748 current dependent increase in AP frequency seen in CK1d<sub>T44A</sub> neurons ( $p>0.05$ , two-way ANOVA,  
749 WT  $n=7$ , CK1d<sub>T44A</sub>  $n=10$ ) abolishing differences in F/I curve slopes (right) between genotypes  
750 ( $p>0.05$ , two-way ANOVA, WT  $n=7$ , CK1d<sub>T44A</sub>  $n=10$ ).

751

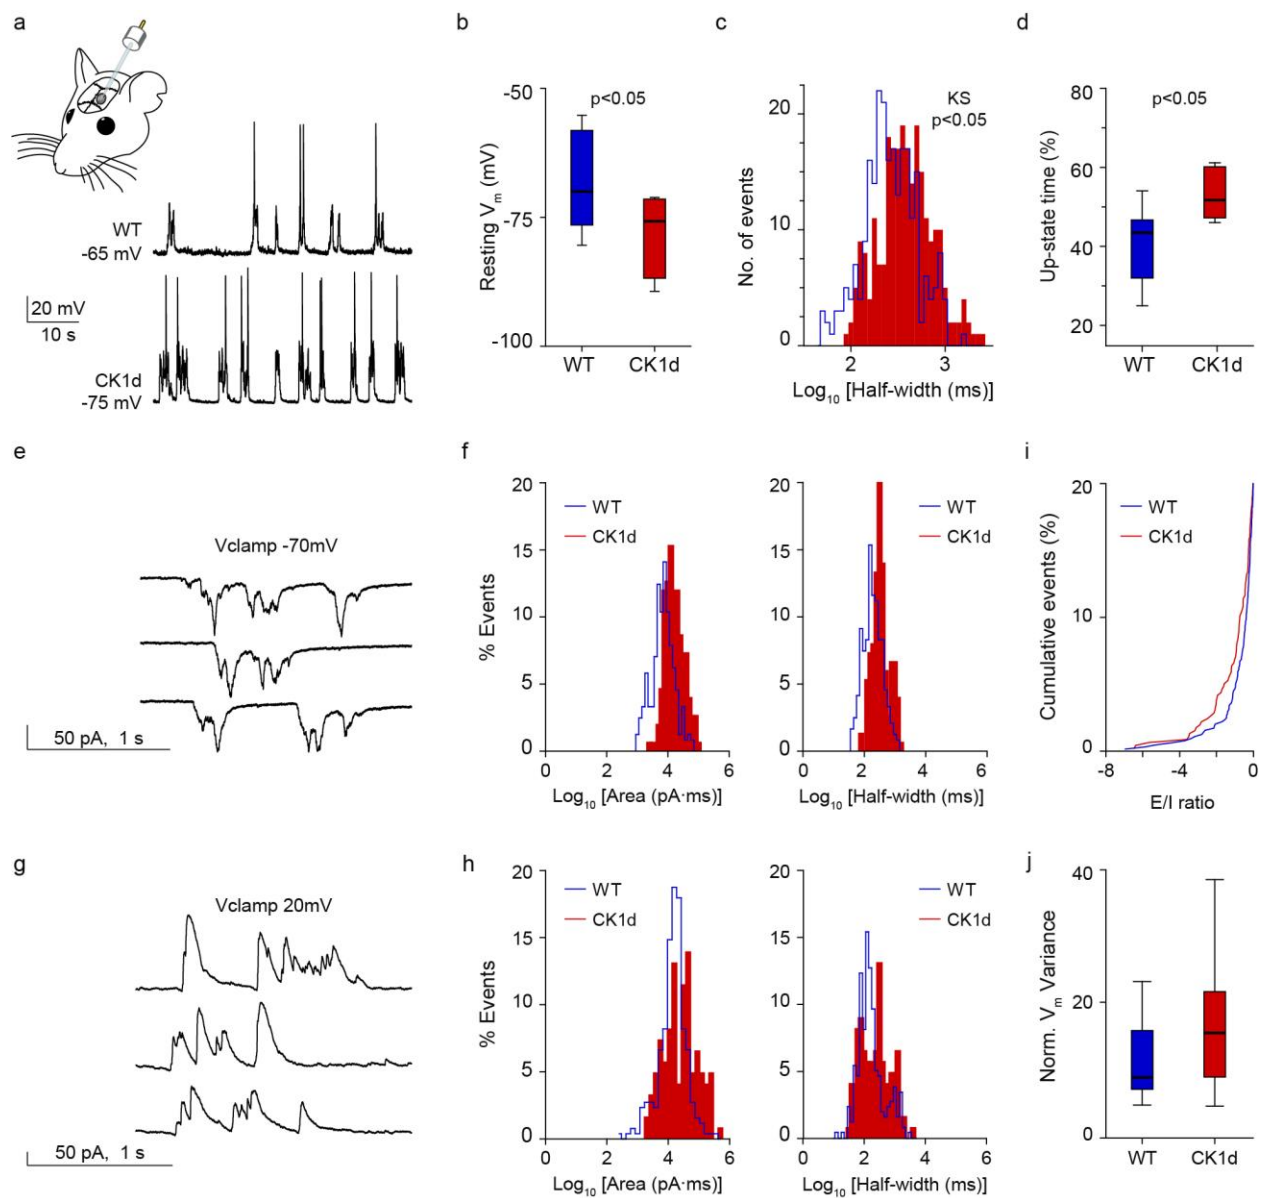



753 **Figure 8: Increased up state duration and  $V_m$  variance CK1d<sub>T44A</sub> mice along with net**  
754 **excitatory shift *in vivo***

755 a] Schematic of *in vivo* whole cell patch clamp experiment as well as representative traces of  
756 current clamp recordings of L2/3 pyramidal neurons from WT (top) and CK1d<sub>T44A</sub> (bottom) mutant  
757 mice, showing bistable anesthetized cortical networks (up and down states). b] CK1d<sub>T44A</sub> neurons  
758 were significantly hyperpolarized ( $p < 0.05$ , t test, WT n=7, CK1d<sub>T44A</sub>n=5) compared to WT neurons  
759 *in vivo*. c] Frequency histograms of up state half-width suggest increased duration of up states in  
760 CK1d<sub>T44A</sub> animals ( $p < 0.05$ , 2-sample KS test, WT n=7, CK1d<sub>T44A</sub>n=5). d] CK1d<sub>T44A</sub> animals also  
761 showed an increase in percent time spent in up states ( $p < 0.05$ , t test, WT n=7, CK1d<sub>T44A</sub>n=5).  
762 Representative traces showing e] EPSCs and g] IPSCs recorded *in vivo* during an up state event.  
763 f] Distribution histograms showing increase in the area and half width of excitatory events ( $P < 0.05$ ,  
764 2-sample KS test, WT n=4, CK1d<sub>T44A</sub>n=4), but no difference in the h] area and half width of  
765 inhibitory events ( $P > 0.05$ , 2-sample KS test, WT n=4, CK1d<sub>T44A</sub>n=4) in CK1d<sub>T44A</sub> animals. i] E/I  
766 ratio skewed towards excitation in CK1d<sub>T44A</sub> animals ( $p < 0.05$ , 2-sample KS test, WT n=4,  
767 CK1d<sub>T44A</sub>n=4). j] Increased membrane potential variance during up states ( $p < 0.0001$ , t test, WT  
768 n=4, CK1d<sub>T44A</sub>n=4) in CK1d<sub>T44A</sub> animals.

769

770 **References**

- 771 1. Lipton, R. B. *et al.* Migraine prevalence, disease burden, and the need for preventive  
772 therapy. *Neurology* **68**, 343–349 (2007).
- 773 2. Stewart, W. F., Ricci, J. A., Chee, E., Morganstein, D. & Lipton, R. Lost productive time and  
774 cost due to common pain conditions in the US workforce. *JAMA* **290**, 2443–2454 (2003).
- 775 3. Murray, C. J. L. *et al.* Disability-adjusted life years (DALYs) for 291 diseases and injuries in  
776 21 regions, 1990–2010: a systematic analysis for the Global Burden of Disease Study 2010.  
777 *Lancet Lond. Engl.* **380**, 2197–2223 (2012).
- 778 4. Brennan, K. C. & Pietrobon, D. A Systems Neuroscience Approach to Migraine. *Neuron* **97**,  
779 1004–1021 (2018).
- 780 5. Mulleners, W. M. *et al.* Self-reported photophobic symptoms in migraineurs and controls are  
781 reliable and predict diagnostic category accurately. *Headache* **41**, 31–39 (2001).
- 782 6. Lipton, R. B. *et al.* Cutaneous allodynia in the migraine population. *Ann. Neurol.* **63**, 148–158  
783 (2008).
- 784 7. Pietrobon, D. & Moskowitz, M. A. Chaos and commotion in the wake of cortical spreading  
785 depression and spreading depolarizations. *Nat. Rev. Neurosci.* **15**, 379–393 (2014).
- 786 8. Ambrosini, A. & Schoenen, J. Electrophysiological response patterns of primary sensory  
787 cortices in migraine. *J. Headache Pain* **7**, 377–388 (2006).
- 788 9. Coppola, G., Pierelli, F. & Schoenen, J. Habituation and migraine. *Neurobiol. Learn. Mem.*  
789 **92**, 249–259 (2009).
- 790 10. Perlman, R. L. Mouse models of human disease. *Evol. Med. Public Health* **2016**, 170–  
791 176 (2016).
- 792 11. Pietrobon, D. Cortical spreading depression and familial hemiplegic migraine 2015. *J.*  
793 *Headache Pain* **16**, (2015).

- 794 12. Pietrobon, D. Familial hemiplegic migraine. *Neurother. J. Am. Soc. Exp. Neurother.* **4**,  
795 274–284 (2007).
- 796 13. Brennan, K. C. *et al.* Casein Kinase I $\delta$  Mutations in Familial Migraine and Advanced  
797 Sleep Phase. *Sci. Transl. Med.* **5**, 183ra56-11 (2013).
- 798 14. Knippschild, U. *et al.* The casein kinase 1 family: participation in multiple cellular  
799 processes in eukaryotes. *Cell. Signal.* **17**, 675–689 (2005).
- 800 15. Wolff, S. *et al.* Casein kinase 1 delta (CK1 $\delta$ ) interacts with the SNARE associated  
801 protein snapin. *FEBS Lett.* **580**, 6477–6484 (2006).
- 802 16. Greer, Y. E., Gao, B., Yang, Y., Nussenzweig, A. & Rubin, J. S. Lack of Casein Kinase 1  
803 Delta Promotes Genomic Instability - The Accumulation of DNA Damage and Down-  
804 Regulation of Checkpoint Kinase 1. *PLOS ONE* **12**, e0170903 (2017).
- 805 17. Etchegaray, J.-P. *et al.* Casein Kinase 1 Delta Regulates the Pace of the Mammalian  
806 Circadian Clock. *Mol. Cell. Biol.* **29**, 3853–3866 (2009).
- 807 18. Sawant-Pokam, P. M., Suryavanshi, P., Mendez, J. M., Dudek, F. E. & Brennan, K. C.  
808 Mechanisms of Neuronal Silencing After Cortical Spreading Depression. *Cereb. Cortex N. Y.*  
809 *N 1991* **27**, 1311–1325 (2017).
- 810 19. Zhang, Z., Matos, S. C., Jego, S., Adamantidis, A. & S $\acute{e}$ gu $\acute{e}$ la, P. Norepinephrine Drives  
811 Persistent Activity in Prefrontal Cortex via Synergistic  $\alpha$ 1 and  $\alpha$ 2 Adrenoceptors. *PLOS ONE*  
812 **8**, e66122 (2013).
- 813 20. Sheets, P. L. *et al.* Corticospinal-specific HCN expression in mouse motor cortex: Ih-  
814 dependent synaptic integration as a candidate microcircuit mechanism involved in motor  
815 control. *J. Neurophysiol.* **106**, 2216–2231 (2011).

- 816 21. Petersen, C. C. H. & Sakmann, B. The Excitatory Neuronal Network of Rat Layer 4  
817 Barrel Cortex. *J. Neurosci.* **20**, 7579–7586 (2000).
- 818 22. Varela, J. A., Song, S., Turrigiano, G. G. & Nelson, S. B. Differential Depression at  
819 Excitatory and Inhibitory Synapses in Visual Cortex. *J. Neurosci.* **19**, 4293–4304 (1999).
- 820 23. Guo, J. *et al.* A Three-Pool Model Dissecting Readily Releasable Pool Replenishment at  
821 the Calyx of Held. *Sci. Rep.* **5**, (2015).
- 822 24. Kaeser, P. S. & Regehr, W. G. The readily releasable pool of synaptic vesicles. *Curr.*  
823 *Opin. Neurobiol.* **43**, 63–70 (2017).
- 824 25. Farrant, M. & Nusser, Z. Variations on an inhibitory theme: phasic and tonic activation of  
825 GABA<sub>A</sub> receptors. *Nat. Rev. Neurosci.* **6**, 215–229 (2005).
- 826 26. Chergui, K., Svenningsson, P. & Greengard, P. Physiological role for casein kinase 1 in  
827 glutamatergic synaptic transmission. *J. Neurosci. Off. J. Soc. Neurosci.* **25**, 6601–6609 (2005).
- 828 27. Kase, D. & Imoto, K. The Role of HCN Channels on Membrane Excitability in the  
829 Nervous System. *Journal of Signal Transduction* (2012). doi:10.1155/2012/619747
- 830 28. Cheetham, C. E. J. & Fox, K. Presynaptic Development at L4 to L2/3 Excitatory  
831 Synapses Follows Different Time Courses in Visual and Somatosensory Cortex. *J. Neurosci.*  
832 **30**, 12566–12571 (2010).
- 833 29. Lefort, S. & Petersen, C. C. H. Layer-Dependent Short-Term Synaptic Plasticity Between  
834 Excitatory Neurons in the C2 Barrel Column of Mouse Primary Somatosensory Cortex.  
835 *Cereb. Cortex* **27**, 3869–3878 (2017).
- 836 30. Fioravante, D. & Regehr, W. G. Short-term forms of presynaptic plasticity. *Curr. Opin.*  
837 *Neurobiol.* **21**, 269–274 (2011).

- 838 31. Abrahamsson, T. *et al.* Differential Regulation of Evoked and Spontaneous Release by  
839 Presynaptic NMDA Receptors. *Neuron* **96**, 839-855.e5 (2017).
- 840 32. Luo, H., Hasegawa, K., Liu, M. & Song, W.-J. Comparison of the Upper Marginal  
841 Neurons of Cortical Layer 2 with Layer 2/3 Pyramidal Neurons in Mouse Temporal Cortex.  
842 *Front. Neuroanat.* **11**, (2017).
- 843 33. Douglas, R. J., Koch, C., Mahowald, M., Martin, K. A. C. & Suarez, H. H. Recurrent  
844 Excitation in Neocortical Circuits. *Science* **269**, 981–985 (1995).
- 845 34. Wilson, C. Up and down states. *Sch. J.* **3**, 1410 (2008).
- 846 35. Gerkin, R. C., Clem, R. L., Shruti, S., Kass, R. E. & Barth, A. L. Cortical Up State  
847 Activity Is Enhanced After Seizures: A Quantitative Analysis. *J. Clin. Neurophysiol. Off.*  
848 *Publ. Am. Electroencephalogr. Soc.* **27**, 425–432 (2010).
- 849 36. Bragin, A., Benassi, S. K. & Engel, J. Patterns of the Up-Down State in normal and  
850 epileptic mice. *Neuroscience* **225**, 76–87 (2012).
- 851 37. Anderson, J. S., Lampl, I., Gillespie, D. C. & Ferster, D. The contribution of noise to  
852 contrast invariance of orientation tuning in cat visual cortex. *Science* **290**, 1968–1972 (2000).
- 853 38. Theriot, J. J., Toga, A. W., Prakash, N., Ju, Y. S. & Brennan, K. C. Cortical sensory  
854 plasticity in a model of migraine with aura. *J. Neurosci. Off. J. Soc. Neurosci.* **32**, 15252–  
855 15261 (2012).
- 856 39. Tottene, A. *et al.* Enhanced Excitatory Transmission at Cortical Synapses as the Basis for  
857 Facilitated Spreading Depression in CaV2.1 Knockin Migraine Mice. *Neuron* **61**, 762–773  
858 (2009).

- 859 40. Tottene, A. *et al.* Familial hemiplegic migraine mutations increase Ca(2+) influx through  
860 single human CaV2.1 channels and decrease maximal CaV2.1 current density in neurons.  
861 *Proc. Natl. Acad. Sci. U. S. A.* **99**, 13284–13289 (2002).
- 862 41. Capuani, C. *et al.* Defective glutamate and K<sup>+</sup> clearance by cortical astrocytes in familial  
863 hemiplegic migraine type 2. *EMBO Mol. Med.* e201505944 (2016).  
864 doi:10.15252/emmm.201505944
- 865 42. Dilekoz, E. *et al.* Migraine Mutations Impair Hippocampal Learning Despite Enhanced  
866 Long-Term Potentiation. *J. Neurosci.* **35**, 3397–3402 (2015).
- 867 43. Xu, Y. *et al.* Functional consequences of a CK1delta mutation causing familial advanced  
868 sleep phase syndrome. *Nature* **434**, 640–644 (2005).
- 869 44. Coppola, G. *et al.* Interictal abnormalities of gamma band activity in visual evoked  
870 responses in migraine: an indication of thalamocortical dysrhythmia? *Cephalalgia Int. J.*  
871 *Headache* **27**, 1360–1367 (2007).
- 872 45. Lampl, I. & Katz, Y. Neuronal adaptation in the somatosensory system of rodents.  
873 *Neuroscience* **343**, 66–76 (2017).
- 874 46. Wark, B., Lundstrom, B. N. & Fairhall, A. Sensory adaptation. *Curr. Opin. Neurobiol.*  
875 **17**, 423–429 (2007).
- 876 47. Heiss, J. E., Katz, Y., Ganmor, E. & Lampl, I. Shift in the balance between excitation and  
877 inhibition during sensory adaptation of S1 neurons. *J. Neurosci. Off. J. Soc. Neurosci.* **28**,  
878 13320–13330 (2008).
- 879 48. Isaacson, J. S. & Scanziani, M. How Inhibition Shapes Cortical Activity. *Neuron* **72**,  
880 231–243 (2011).

- 881 49. Higley, M. J. & Contreras, D. Balanced excitation and inhibition determine spike timing  
882 during frequency adaptation. *J. Neurosci. Off. J. Soc. Neurosci.* **26**, 448–457 (2006).
- 883 50. Hsu, S.-F., Augustine, G. J. & Jackson, M. B. Adaptation of Ca<sup>2+</sup>-Triggered Exocytosis  
884 in Presynaptic Terminals. *Neuron* **17**, 501–512 (1996).
- 885 51. Regehr, W. G. Short-Term Presynaptic Plasticity. *Cold Spring Harb. Perspect. Biol.* **4**,  
886 a005702 (2012).
- 887 52. Lipstein, N. *et al.* Dynamic Control of Synaptic Vesicle Replenishment and Short-Term  
888 Plasticity by Ca<sup>2+</sup>-Calmodulin-Munc13-1 Signaling. *Neuron* **79**, 82–96 (2013).
- 889 53. Bui, L. & Glavinović, M. I. Is replenishment of the readily releasable pool associated  
890 with vesicular movement? *Cogn. Neurodyn.* **8**, 99–110 (2014).
- 891 54. Martin, T. F. J. Tuning exocytosis for speed: fast and slow modes. *Biochim. Biophys.*  
892 *Acta BBA - Mol. Cell Res.* **1641**, 157–165 (2003).
- 893 55. Inchauspe, C. G. *et al.* Presynaptic CaV2.1 calcium channels carrying familial hemiplegic  
894 migraine mutation R192Q allow faster recovery from synaptic depression in mouse calyx of  
895 Held. *J. Neurophysiol.* **108**, 2967–2976 (2012).
- 896 56. Alabi, A. A. & Tsien, R. W. Synaptic Vesicle Pools and Dynamics. *Cold Spring Harb.*  
897 *Perspect. Biol.* **4**, (2012).
- 898 57. Yamasaki, T., Kawasaki, H. & Nishina, H. Diverse Roles of JNK and MKK Pathways in  
899 the Brain. *Journal of Signal Transduction* (2012). doi:10.1155/2012/459265
- 900 58. Fourcaudot, E. *et al.* cAMP/PKA signaling and RIM1 $\alpha$  mediate presynaptic LTP in the  
901 lateral amygdala. *Proc. Natl. Acad. Sci.* **105**, 15130–15135 (2008).

- 902 59. Bidoret, C., Ayon, A., Barbour, B. & Casado, M. Presynaptic NR2A-containing NMDA  
903 receptors implement a high-pass filter synaptic plasticity rule. *Proc. Natl. Acad. Sci.*  
904 *pnas.0904284106* (2009). doi:10.1073/pnas.0904284106
- 905 60. Banerjee, A., Larsen, R. S., Philpot, B. D. & Paulsen, O. Roles of Presynaptic NMDA  
906 Receptors in Neurotransmission and Plasticity. *Trends Neurosci.* **39**, 26–39 (2016).
- 907 61. Brasier, D. J. & Feldman, D. E. Synapse-Specific Expression of Functional Presynaptic  
908 NMDA Receptors in Rat Somatosensory Cortex. *J. Neurosci.* **28**, 2199–2211 (2008).
- 909 62. Yang, J., Woodhall, G. L. & Jones, R. S. G. Tonic Facilitation of Glutamate Release by  
910 Presynaptic NR2B-Containing NMDA Receptors Is Increased in the Entorhinal Cortex of  
911 Chronically Epileptic Rats. *J. Neurosci.* **26**, 406–410 (2006).
- 912 63. Larsen, R. S. *et al.* Synapse-specific control of experience-dependent plasticity by  
913 presynaptic NMDA receptors. *Neuron* **83**, 879–893 (2014).
- 914 64. Zhou, N. *et al.* Regenerative glutamate release by presynaptic NMDA receptors  
915 contributes to spreading depression. *J. Cereb. Blood Flow Metab. Off. J. Int. Soc. Cereb.*  
916 *Blood Flow Metab.* **33**, 1582–1594 (2013).
- 917 65. Ma, C., Su, L., Seven, A. B., Xu, Y. & Rizo, J. Reconstitution of the vital functions of  
918 Munc18 and Munc13 in neurotransmitter release. *Science* **339**, 421–425 (2013).
- 919 66. Yang, X. *et al.* Syntaxin opening by the MUN domain underlies the function of Munc13  
920 in synaptic-vesicle priming. *Nat. Struct. Mol. Biol.* **22**, 547–554 (2015).
- 921 67. A phosphatidylinositol 4,5-bisphosphate-sensitive casein kinase I alpha associates with  
922 synaptic vesicles and phosphorylates a subset of vesicle proteins. *J. Cell Biol.* **130**, 711–724  
923 (1995).



- 924 68. Zhang, N. *et al.* Phosphorylation of Synaptic Vesicle Protein 2A at Thr84 by Casein  
925 Kinase 1 Family Kinases Controls the Specific Retrieval of Synaptotagmin-1. *J. Neurosci.* **35**,  
926 2492–2507 (2015).
- 927 69. Pyle, R. A., Schivell, A. E., Hidaka, H. & Bajjalieh, S. M. Phosphorylation of synaptic  
928 vesicle protein 2 modulates binding to synaptotagmin. *J. Biol. Chem.* **275**, 17195–17200  
929 (2000).
- 930 70. Buxton, P. *et al.* Identification and characterization of Snapin as a ubiquitously expressed  
931 SNARE-binding protein that interacts with SNAP23 in non-neuronal cells. *Biochem. J.* **375**,  
932 433–440 (2003).
- 933 71. Murray, M. M., Lewkowicz, D. J., Amedi, A. & Wallace, M. T. Multisensory Processes:  
934 A Balancing Act across the Lifespan. *Trends Neurosci.* **39**, 567–579 (2016).
- 935 72. Haider, B. & McCormick, D. A. Rapid neocortical dynamics: cellular and network  
936 mechanisms. *Neuron* **62**, 171–189 (2009).
- 937 73. Zaghera, E. & McCormick, D. A. Neural control of brain state. *Curr. Opin. Neurobiol.* **29**,  
938 178–186 (2014).
- 939 74. Bartram, J. *et al.* Cortical Up states induce the selective weakening of subthreshold  
940 synaptic inputs. *Nat. Commun.* **8**, 665 (2017).
- 941 75. Petersen, C. C. H., Hahn, T. T. G., Mehta, M., Grinvald, A. & Sakmann, B. Interaction of  
942 sensory responses with spontaneous depolarization in layer 2/3 barrel cortex. *Proc. Natl.*  
943 *Acad. Sci.* **100**, 13638–13643 (2003).
- 944 76. Hodkinson, D. J. *et al.* Increased Amplitude of Thalamocortical Low-Frequency  
945 Oscillations in Patients with Migraine. *J. Neurosci.* **36**, 8026–8036 (2016).

- 946 77. Meis, S., Endres, T., Munsch, T. & Lessmann, V. Presynaptic Regulation of Tonic  
947 Inhibition by Neuromodulatory Transmitters in the Basal Amygdala. *Mol. Neurobiol.* **55**,  
948 8509–8521 (2018).
- 949 78. Glykys, J. & Mody, I. The main source of ambient GABA responsible for tonic inhibition  
950 in the mouse hippocampus. *J. Physiol.* **582**, 1163–1178 (2007).
- 951 79. Song, I. *et al.* Different transporter systems regulate extracellular GABA from vesicular  
952 and non-vesicular sources. *Front. Cell. Neurosci.* **7**, 23 (2013).
- 953 80. Richerson, G. B. & Wu, Y. Dynamic Equilibrium of Neurotransmitter Transporters: Not  
954 Just for Reuptake Anymore. *J. Neurophysiol.* **90**, 1363–1374 (2003).
- 955 81. Wu, Y., Wang, W. & Richerson, G. B. GABA Transaminase Inhibition Induces  
956 Spontaneous and Enhances Depolarization-Evoked GABA Efflux via Reversal of the GABA  
957 Transporter. *J. Neurosci.* **21**, 2630–2639 (2001).
- 958 82. Wu, Y., Wang, W., Díez-Sampedro, A. & Richerson, G. B. Nonvesicular inhibitory  
959 neurotransmission via reversal of the GABA transporter GAT-1. *Neuron* **56**, 851–865 (2007).
- 960 83. Medrihan, L., Ferrea, E., Greco, B., Baldelli, P. & Benfenati, F. Asynchronous GABA  
961 Release Is a Key Determinant of Tonic Inhibition and Controls Neuronal Excitability: A  
962 Study in the Synapsin II<sup>-/-</sup> Mouse. *Cereb. Cortex* **25**, 3356–3368 (2015).
- 963 84. Lebas, A. *et al.* Severe Attacks of Familial Hemiplegic Migraine, Childhood Epilepsy  
964 and ATP1A2 Mutation. *Cephalalgia* **28**, 774–777 (2008).
- 965
