# Supplementary material for: Increased presynaptic excitability in a migraine with aura mutation
Source: bioRxiv or medRxiv preprint supplement (doi:10.1101/719039), 2023-06-01
Supplement: Supplementary file [file media-1.pdf]

## Supplementary figures:

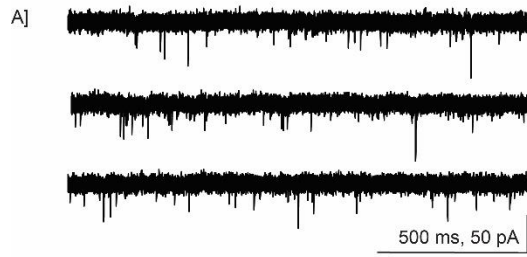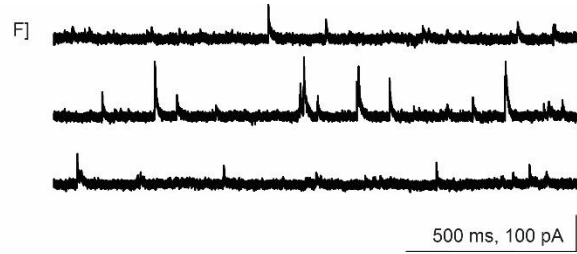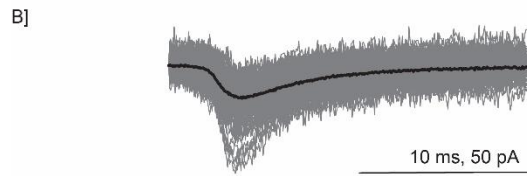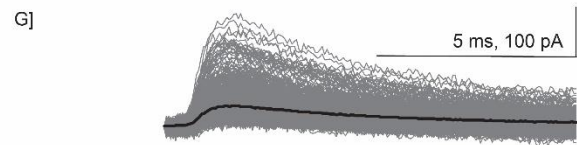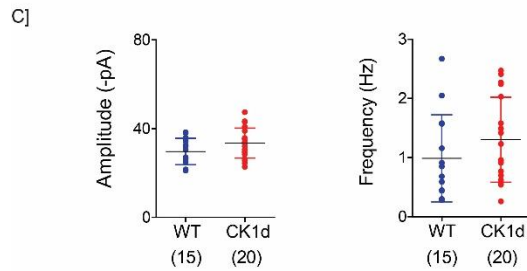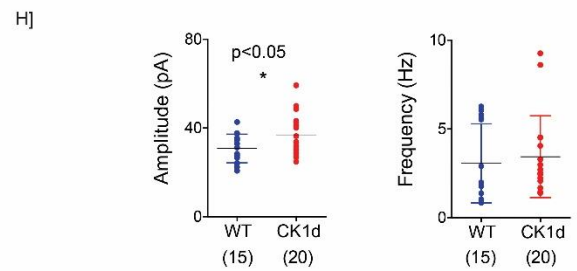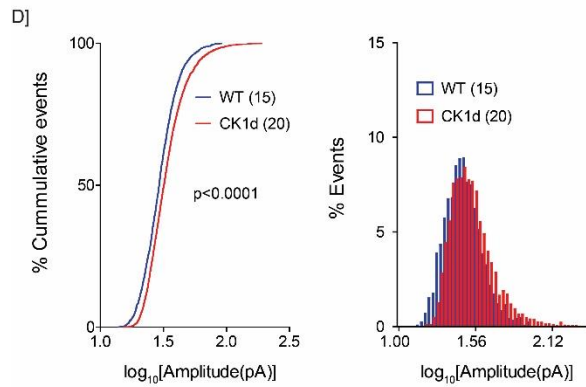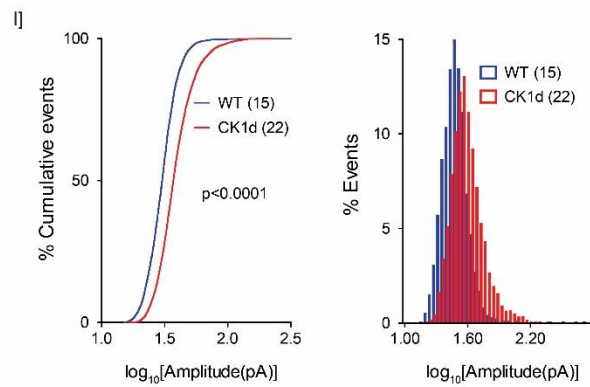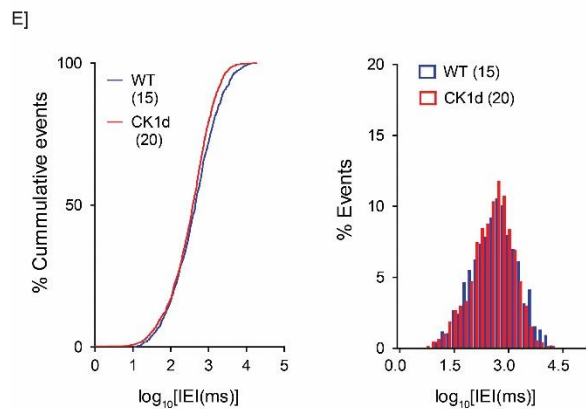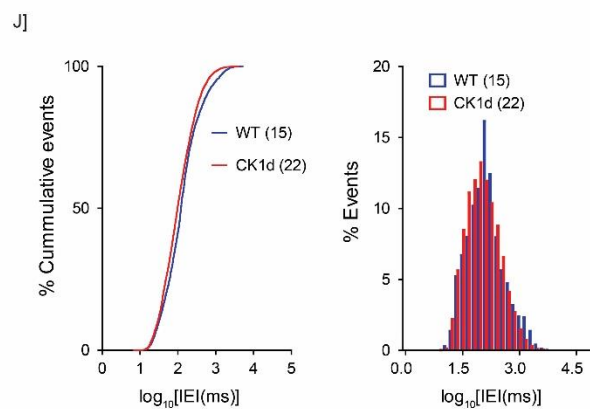

## Supplementary figure1: Increased amplitude of spontaneous EPSCs and IPSCs in CK1d<sub>T44A</sub> neurons

A] Representative traces of spontaneous excitatory post synaptic currents (EPSC) recorded by clamping neurons at -70mV. B] Traces of individual EPSC events (gray) and average value for all events (black) for a single neuron. C] A trend towards increase in EPSC amplitude (left,  $p=0.09$ , t test, WT  $n=15$ , CK1d<sub>T44A</sub>  $n=20$ ), with no significant difference EPSC frequency (right,  $p=0.97$ , t test, WT  $n=15$ , CK1d<sub>T44A</sub>  $n=20$ ) between WT and CK1d<sub>T44A</sub> neurons. D] Cumulative frequency distribution (left) as well as frequency distribution histogram (right) of EPSC amplitudes showing significantly more high amplitude events in CK1d<sub>T44A</sub> neurons ( $p<0.0001$ , 2-sample KS test, WT  $n=15$ , CK1d<sub>T44A</sub>  $n=20$ ). E] Cumulative frequency distribution (left) as well as frequency distribution histogram (right) of EPSC inter event intervals showing no significant difference between WT and CK1d<sub>T44A</sub> neurons ( $p>0.05$ , 2-sample KS test, WT  $n=15$ , CK1d<sub>T44A</sub>  $n=20$ ). F] Representative traces of spontaneous inhibitory post synaptic currents (IPSC) recorded by clamping neurons at 10mV. G] Traces of individual IPSC events (gray) and average value for all events (black) for a single neuron. H] Significant increase in IPSC amplitude (left,  $p<0.05$ , t test, WT  $n=15$ , CK1d<sub>T44A</sub>  $n=22$ ), with no significant difference EPSC frequency (right,  $p=0.97$ , t test, WT  $n=15$ , CK1d<sub>T44A</sub>  $n=22$ ) between WT and CK1d<sub>T44A</sub> neurons. I] Cumulative frequency distribution (left) as well as frequency distribution histogram (right) of IPSC amplitudes showing significantly more high amplitude events in CK1d<sub>T44A</sub> neurons ( $p<0.0001$ , 2-sample KS test, WT  $n=15$ , CK1d<sub>T44A</sub>  $n=22$ ). J] Cumulative frequency distribution (left) as well as frequency distribution histogram (right) of IPSC inter event intervals showing no significant difference between WT and CK1d<sub>T44A</sub> neurons ( $p>0.05$ , 2-sample KS test, WT  $n=15$ , CK1d<sub>T44A</sub>  $n=22$ ).

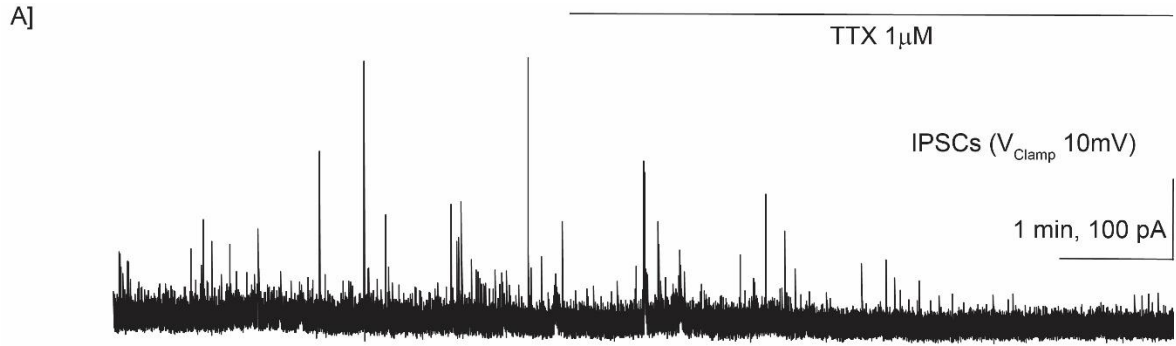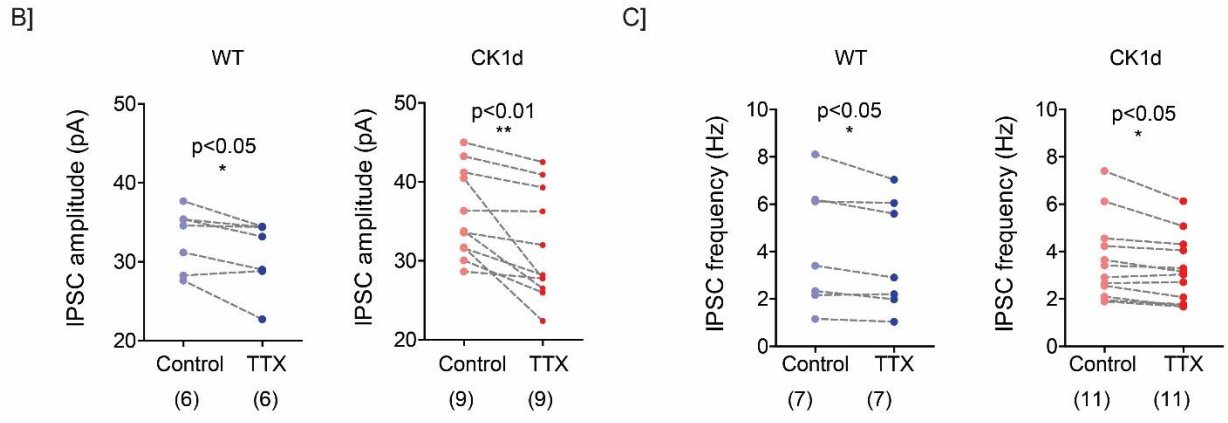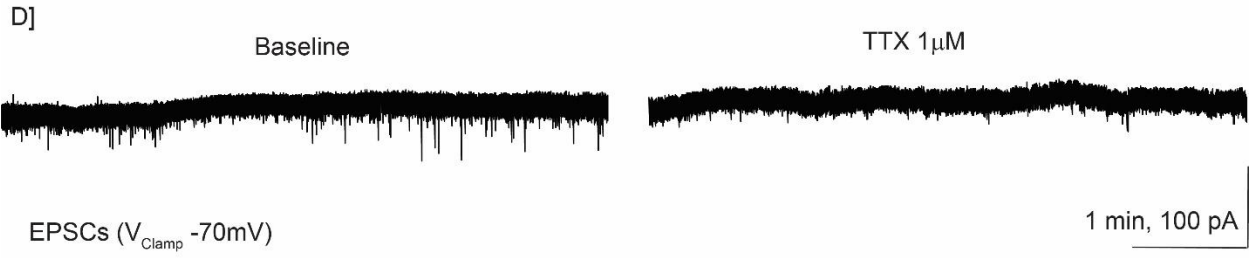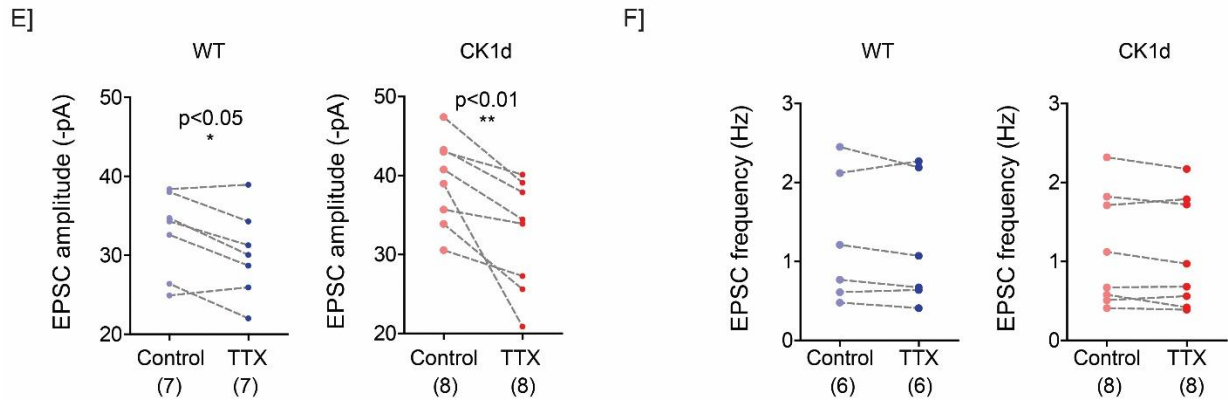

**Supplementary figure 2: 1 $\mu$ m TTX treatment induced decrease in IPSC and EPSC amplitude more prominent in CK1d<sub>T44A</sub> neurons**

A] Representative trace showing reduction in spontaneous IPSC amplitude and frequency, with 1 $\mu$ m TTX treatment for approximately 5 minutes. B] Decrease in IPSC amplitude after 1 $\mu$ m TTX treatment, in WT ( $p < 0.05$ , paired t test,  $n = 6$ ) as well as CK1d<sub>T44A</sub> neurons ( $p < 0.01$ , paired t test,  $n = 9$ ). The p values indicate that decrease was more prominent in CK1d<sub>T44A</sub> neurons compared to WT. C] Decrease in IPSC frequency after 1 $\mu$ m TTX treatment in WT ( $p < 0.05$ , paired t test,  $n = 7$ ) as well as CK1d<sub>T44A</sub> neurons ( $p < 0.05$ , paired t test,  $n = 11$ ). D] Representative trace showing reduction in spontaneous EPSCs after 1 $\mu$ m TTX. E] Decrease in EPSC amplitude after 1 $\mu$ m TTX treatment, in WT ( $p < 0.05$ , paired t test,  $n = 7$ ) as well as CK1d<sub>T44A</sub> neurons ( $p < 0.01$ , paired t test,  $n = 8$ ). The p values indicate that decrease was more prominent in CK1d<sub>T44A</sub> neurons compared to WT. F] No significant change in EPSC frequency after 1 $\mu$ m TTX treatment in WT ( $p > 0.05$ , paired t test,  $n = 6$ ) as well as CK1d<sub>T44A</sub> neurons ( $p > 0.05$ , paired t test,  $n = 8$ ).

A]

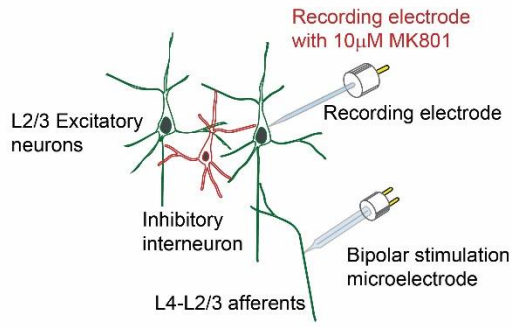

B]

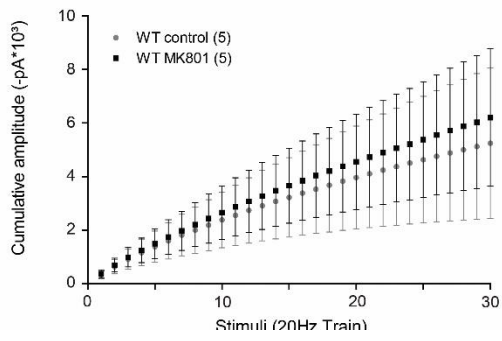

C]

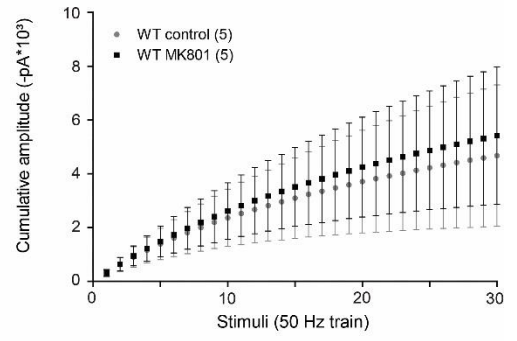

D]

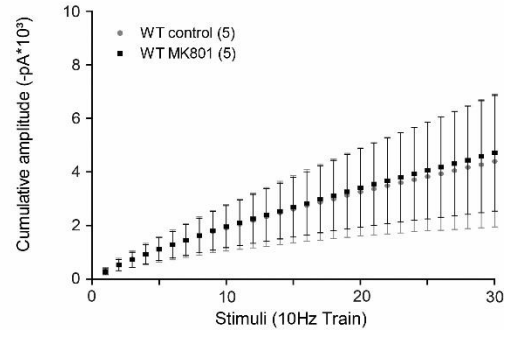

### **Supplementary figure 3: Effect of selective post-synaptic NMDAR blockade on presynaptic adaption**

A] Schematic showing strategy for selective blockade of post synaptic NMDARs with 10 $\mu$ M MK801 in patch pipette. Selectively blocking post-synaptic NMDARs had no significant effect on pre-synaptic adaptation to either 50 Hz (B:  $p > 0.05$ , two-way ANOVA, WT control vs WT MK801,  $n=5$ ), 20Hz (C:  $p > 0.05$ , two-way ANOVA, WT control vs WT MK801,  $n=5$ ) or 10Hz train of 30 stimuli (D:  $p > 0.05$ , two-way ANOVA, WT control vs WT MK801,  $n=5$ )
